# Supplementary material for: The Drosophila EGF domain protein uninflatable sets the switch between wrapping glia growth and axon wrapping instructed by Notch
Source: eLife. 2026 Feb 3;14:RP105759. doi: 10.7554/eLife.105759 (PMC12867482; doi:10.7554/eLife.105759)
Supplement: Supplementary file 1. [file elife-105759-supp1.xlsx]

## Sheet: supplementary Table 1
Annotation		Gene	Name	Type	identifier	off targets	Classification
CG9166		CG9166	-	RNAi	28109	0	0
CG9852		140up	upstream of RpII140	RNAi	48716	0	0
CG31196		14-3-3epsilon	14-3-3epsilon	RNAi	BL34884		0
CG17870		14-3-3zeta	14-3-3zeta	RNAi	48724	0	0
CG8896		18w	18 wheeler	RNAi	44387	1	0
CG42283		5PtaseI	5PtaseI	RNAi	25030		0
CG32062		A2bp1	Ataxin-2 binding protein 1	RNAi	110518	1	0
CG5430		a5	antennal protein 5	RNAi	100657	0	0
CG3771		a6	a6	RNAi	1840	0	0
CG31322		Aats-met-m	mitochondrial methionyl-tRNA synthetase	RNAi	106493	0	0
CG7955		ABCB7	-	RNAi	106039	0	0
CG10325		abd-A	abdominal A	RNAi	BL28739		0
CG11648		Abd-B	Abdominal B	RNAi	104872	3	0
CG9749		Abi	Abelson interacting protein	RNAi	9749R-3		0
CG10083		Abp1	Actin binding protein 1	RNAi	38330	0	0
CG9210		Ac13E	Adenylyl cyclase 35C	RNAi	11547	0	0
CG11198		ACC	Acetyl-CoA carboxylase	RNAi	BL34885		0
CG9709		Acox57D-d	acyl-Coenzyme A oxidase at 57D distal	RNAi	29117	1	0
CG9707		Acox57D-p	acyl-Coenzyme A oxidase at 57D proximal	RNAi	BL50567		0
CG8732		Acsl	Acyl-CoA synthetase long-chain	RNAi	3222	0	0
CG12051		Act42A	Actin 42A	RNAi	12456	2	0
CG10067		Act57B	Actin 57B	RNAi	102129	0	0
CG4027		Act5C	Actin 5C	RNAi	7139	5	0
CG7478		Act79B	Actin 79B	RNAi	102588	0	0
CG18290		Act87E	Actin 87E	RNAi	102480	0	0
CG5178		Act88F	Actin 88F	RNAi	9780	0	0
CG4376		Actn	alpha actinin	RNAi	7760	1	0
CG8953		Actn3	alpha actinin 3	RNAi	106162	0	0
CG11994		Ada	Adenosine deaminase	RNAi	18720	0	0
CG5315		AdipoR	Adiponectin receptor	RNAi	40935	0	0
CG10253		ADPS	Alkyldihydroxyacetonephosphate synthase	RNAi	BL34350		0
CG5032		aft	adrift	RNAi	46174	0	0
CG4633		AlaRS-m	Alanyl-tRNA synthetase, mitochondrial	RNAi	21905	1	0
CG12876		ALiX	ALG-2 interacting protein X	RNAi	32047	0	0
CG17223		alpha4GT1	alpha4GT1	RNAi	2609	0	0
CG17947		alpha-Cat	alpha Catenin	RNAi	20123	0	0
CG2987		alpha-Catr	alpha-catenin related	RNAi	2987R-3		0
CG1913		alphaTub84B	alpha-Tubulin at 84B	RNAi	33427		0
CG9476		alphaTub85E	alpha-Tubulin at 85E	RNAi	103202	0	0
CG2198		Ama	Amalgam	RNAi	22944	0	0
CG10393		amos	absent MD neurons and olfactory sensilla	RNAi	11796		0
CG8604		Amph	Amphiphysin	RNAi	9264	1	0
CG12127		amx	almondex	RNAi	3295	26	0
CG6631		ana1	anastral spindle 1	RNAi	BL61867		0
CG8262		ana2	anastral spindle 2	RNAi	44359	0	0
CG13162		ana3	anastral spindle 3	RNAi	101280	0	0
CG12273		angel	angel	RNAi	42919	0	0
CG42734		Ank2	Ankyrin 2	RNAi	40638	1	0
CG1028		Antp	Antennapedia	RNAi	101774	0	0
CG5730		AnxB9	Annexin B9	RNAi	106867	0	0
CG4531		aos	argos	RNAi	47181		0
CG9388		AP-1mu	Adaptor Protein complex 1, mu subunit	RNAi	BL27534		0
CG5864		AP-1sigma	Adaptor Protein complex 1, sigma subunit	RNAi	12913		0
CG7057		AP-2mu	Adaptor Protein complex 2, mu subunit	RNAi	103390	0	0
CG6056		AP-2sigma	Adaptor Protein complex 2, sigma subunit	RNAi	34148	0	0
CG11419		APC10	Anaphase Promoting Complex subunit 10	RNAi	107331	0	0
CG6193		Apc2	Adenomatous polyposis coli tumor suppressor homolog 2	RNAi	22290	0	0
CG31713		Apf	diadenosine tetraphosphate hydrolase	RNAi	39150	0	0
CG42783		aPKC	atypical protein kinase C	RNAi	BL38245		0
CG15828		Apoltp	Apolipoprotein lipid transfer particle	RNAi	BL51937		0
CG7727		Appl	beta amyloid protein precursor-like	RNAi	108312	1	0
CG10571		ara	araucan	RNAi	101903	0	0
CG31762		aret	arrest	RNAi	41567	2	0
CG11027		Arf102F	ADP ribosylation factor at 102F	RNAi	12931	1	0
CG8156		Arf51F	ADP ribosylation factor at 51F	RNAi	100726	0	0
CG4237		ArfGAP1	GTPase-activating protein 69C	RNAi	BL50584		0
CG17184		Arfip	Arfaptin	RNAi	20401	1	0
CG6025		Arl1	ADP ribosylation factor-like 1	RNAi	17826	0	0
CG7435		Arl2	ADP ribosylation factor-like 2	RNAi	BL29588		0
CG2219		Arl4	ADP ribosylation factor-like 4	RNAi	41690	1	0
CG11579		arm	armadillo	RNAi	107344	0	0
CG11513		armi	armitage	RNAi	103589	0	0
CG6174		Arp1	Actin-related protein 1	RNAi	BL32032		0
CG12235		Arp10	Actin-related protein 10	RNAi	104010	0	0
CG5409		Arp53D	Actin-related protein 53D	RNAi	22690	0	0
CG11678		Arp6	Actin-related protein 6	RNAi	17242	0	0
CG8978		Arpc1	Actin-related protein 2/3 complex, subunit 1	RNAi	42172	1	0
CG4560		Arpc3A	Actin-related protein 2/3 complex, subunit 3A	RNAi	26549	0	0
CG5972		Arpc4	Actin-related protein 2/3 complex, subunit 4	RNAi	5972R-1		0
CG9881		Arpc5	Actin-related protein 2/3 complex, subunit 5	RNAi	28141	0	0
CG9882		Art7	Arginine methyltransferase 7	RNAi	BL36832		0
CG16840		Art8	Arginine methyltransferase 8	RNAi	20305	0	0
CG4276		aru	arouser	RNAi	26482	2	0
CG3893		arx	asterix	RNAi	40479	0	0
CG8887		ash1	absent, small, or homeotic discs 1	RNAi	108832	0	0
CG4720		Ask1	Apoptotic signal-regulating kinase 1	RNAi	110228	0	0
CG2919		asl	asterless	RNAi	25457	0	0
CG6875		asp	abnormal spindle	RNAi	110177	0	0
CG18375		ASPP	Ankyrin-repeat, SH3-domain, and Proline-rich-region containing Protein	RNAi	25332	0	0
CG4426		ast	asteroid	RNAi	7143	0	0
CG14919		AstC	Allatostatin C	RNAi	13773	0	0
CG9200		Atac1	Ada2a-containing complex component 1	RNAi	108992	1	0
CG2969		Atet	ABC transporter expressed in trachea	RNAi	42750	0	0
CG44246		Atf-2	Activating transcription factor-2	RNAi	BL60124		0
CG3136		Atf6	Atf6	RNAi	36504	0	0
CG10861		Atg12	Autophagy-related 12	RNAi	BL34675		0
CG7986		Atg18a	Autophagy-related 18a	RNAi	22643	0	0
CG5489		Atg7	Autophagy-related 7	RNAi	45558	0	0
CG14741		ATP8B	ATPase 8B	RNAi	102648	0	0
CG31477		ATPsynepsilonL	ATP synthase, epsilon subunit-like	RNAi	BL62887		0
CG3068		aurA	aurora A	RNAi	108446	0	0
CG6620		aurB	aurora B	RNAi	35107	4	0
CG15727		Aven	Aven ortholog	RNAi	19577	0	0
CG1072		Awh	Arrowhead	RNAi	108409	0	0
CG9703		Axs	Abnormal X segregation	RNAi	6137	2	0
CG11785		bai	baiser	RNAi	100612	0	0
CG3971		Baldspot	Baldspot	RNAi	101557	0	0
CG6546		Bap55	Brahma associated protein 55kD	RNAi	6546R-1	0	0
CG10726		barr	barren	RNAi	26759	0	0
CG5055		baz	bazooka	RNAi	5055R-2		0
CG6016		bbc	bb in a boxcar	RNAi	7989	0	0
CG13232		BBS4	Bardet-Biedl syndrome 4 ortholog (H. sapiens)	RNAi	100571	0	0
CG13691		BBS8	Bardet-Biedl syndrome 8 ortholog (H. sapiens)	RNAi	32058	0	0
CG14001		bchs	blue cheese	RNAi	45028	0	0
CG16857		Bdl	Borderless	RNAi	4806		0
CG32594		be	ben	RNAi	BL54834		0
CG4838		beat-Ic	beaten path Ic	RNAi	4838R-3		0
CG14334		beat-IIa	beaten path IIa	RNAi	14334R-2		0
CG15138		beat-IIIc	beat-IIIc	RNAi	27137	0	0
CG7842		beg	bad egg	RNAi	14279	1	0
CG8734		beta3GalTII	Galactosyltransferase II	RNAi	106134	1	0
CG8536		beta4GalNAcTA	beta4GalNAcTA	RNAi	4869	0	0
CG14517		beta4GalNAcTB	beta4GalNAcTB	RNAi	42693	0	0
CG6699		beta'COP	Coat Protein (coatomer) beta'	RNAi	42071	1	0
CG2135		betaGlu	beta glucuronidase	RNAi	103338	0	0
CG4869		betaTub97EF	beta-Tubulin at 97EF	RNAi	105075	1	0
CG5529		B-H1	BarH1	RNAi	BL52954		0
CG5488		B-H2	BarH2	RNAi	BL33647		0
CG3578		bi	bifid	RNAi	100598	1	0
CG4824		BicC	Bicaudal C	RNAi	BL34997		0
CG6605		BicD	Bicaudal D	RNAi	27684	0	0
CG1822		bif	bifocal	RNAi	109722	0	0
CG18647		bin	biniou	RNAi	9409	0	0
CG7574		bip1	bip1	RNAi	26104	0	0
CG30077		Blos1	Biogenesis of lysosome-related organelles complex 1, subunit 1	RNAi	25568	0	0
CG14145		Blos2	Biogenesis of lysosome-related organelles complex 1, subunit 2	RNAi	BL54835		0
CG3897		blot	bloated tubules	RNAi	3897R-3		0
CG7314		Bmcp	Bmcp	RNAi	BL37498		0
CG5295		bmm	brummer	RNAi	37880	0	0
CG1480		bnk	bottleneck	RNAi	102160	0	0
CG4608		bnl	branchless	RNAi	4608R-1	0	0
CG30498		boca	boca	RNAi	13457	0	0
CG32796		boi	brother of ihog	RNAi	3060	0	0
CG6921		bond	james bond	RNAi	30179	0	0
CG8285		boss	bride of sevenless	RNAi	4366		0
CG15110		botv	brother of tout-velu	RNAi	108262	1	0
CG10021		bowl	brother of odd with entrails limited	RNAi	BL27074		0
CG5942		brm	brahma	RNAi	37721	2	0
CG4934		brn	brainiac	RNAi	45457		0
CG42344		brp	bruchpilot	RNAi	38746		0
CG2478		bru	brunelleschi	RNAi	12482	0	0
CG3411		bs	blistered	RNAi	100609	0	0
CG5680		bsk	basket	RNAi	104569	0	0
CG32019		bt	bent	RNAi	46253	0	0
CG8049		Btk29A	Btk family kinase at 29A	RNAi	22675	0	0
CG32134		btl	breathless	RNAi	27106		0
CG44012		btsz	bitesize	RNAi	102608	0	0
CG15148		btv	beethoven	RNAi	105152	1	0
CG12878		btz	barentsz	RNAi	38722	1	0
CG7581		Bub3	Bub3	RNAi	21037	0	0
CG7838		BubR1	Bub1-related kinase	RNAi	26109	0	0
CG13969		bwa	brain washing	RNAi	8071	0	0
CG9379		by	blistery	RNAi	22823	0	0
CG9520		C1GalTA	Core 1 Galactosyltransferase A	RNAi	2827	0	0
CG42328		C3G	C3G ortholog (H. sapiens)	RNAi	105664	0	0
CG43368		cac	cacophony	RNAi	104168	0	0
CG6445		Cad74A	Cadherin 74A	RNAi	105168	0	0
CG42601		Cad86C	Cadherin 86C	RNAi	5097		0
CG6977		Cad87A	Cadherin 87A	RNAi	6977R-4		0
CG3389		Cad88C	Cadherin 88C	RNAi	36164	0	0
CG10244		Cad96Ca	Cadherin 96Ca	RNAi	49398	0	0
CG13664		Cad96Cb	Cadherin 96Cb	RNAi	39800	0	0
CG7100		CadN	Cadherin-N	RNAi	1092	0	0
CG42829		CadN2	Cadherin-N2	RNAi	36168	0	0
CG12892		Caf1-105	Chromatin assembly factor 1, p105 subunit	RNAi	20270	0	0
CG5148		cal1	chromosome alignment defect 1	RNAi	45248	0	0
CG7563		CalpA	Calpain-A	RNAi	101294	0	0
CG8445		calypso	calypso	RNAi	47743	0	0
CG8472		Cam	Calmodulin	RNAi	28242	0	0
CG42332		Camta	Calmodulin-binding transcription activator	RNAi	106025	0	0
CG33694		cana	CENP-ana	RNAi	49776	2	0
CG1455		CanA1	Calcineurin A1	RNAi	32283	1	0
CG11217		CanB2	Calcineurin B2	RNAi	104370	1	0
CG1911		Cap-D2	CAP-D2 condensin subunit	RNAi	108289	0	0
CG34438		Cap-G	Chromosome associated protein G	RNAi	40047	0	0
CG14685		Cap-H2	Chromosome associated protein H2	RNAi	24905	0	0
CG33979		capt	capulet	RNAi	21995	0	0
CG3399		capu	cappuccino	RNAi	34278	0	0
CG12230		car	carnation	RNAi	4548	1	0
CG10605		caup	caupolican	RNAi	2931	0	0
CG6219		cav	caravaggio	RNAi	15021	1	0
CG4840		cbs	centrosomin's beautiful sister	RNAi	21959	0	0
CG13415		Cby	Chibby	RNAi	49138	0	0
CG14127		CCDC151	Coiled-coil domain containing protein 151	RNAi	106258	0	0
CG17753		Ccs	Copper chaperone for superoxide dismutase	RNAi	20536	0	0
CG8258		CCT8	Chaperonin containing TCP1 subunit 8	RNAi	45790	0	0
CG14980		Ccz1	Caffeine, calcium, zinc sensitivity 1	RNAi	18479	0	0
CG7134		cdc14	cell division cycle 14	RNAi	27881		0
CG6759		Cdc16	Cell division cycle 16 ortholog	RNAi	44869	0	0
CG2508		Cdc23	Cell division cycle 23 ortholog	RNAi	107306	0	0
CG1362		Cdc2rk	Cdc2-related kinase	RNAi	100299	0	0
CG12530		Cdc42	Cdc42	RNAi	100794	1	0
CG6905		Cdc5	Cell division cycle 5 ortholog	RNAi	109369	2	0
CG44193		Cdep	Chondrocyte-derived ezrin-like domain containing protein ortholog (H. sapiens)	RNAi	104438	0	0
CG10538		CdGAPr	Cd GTPase activating protein-related	RNAi	109407	0	0
CG6027		cdi	center divider	RNAi	43634	0	0
CG3319		Cdk7	Cyclin-dependent kinase 7	RNAi	10442		0
CG5179		Cdk9	Cyclin-dependent kinase 9	RNAi	30448		0
CG5450		Cdlc2	Cytoplasmic dynein light chain 2	RNAi	42113	2	0
CG7212		cdm	cadmus	RNAi	7212R-2		0
CG6742		CenB1A	Centaurin beta 1A	RNAi	27739	2	0
CG31811		CenG1A	Centaurin gamma 1A	RNAi	100123	1	0
CG31258		Cenp-C	Centromeric protein-C	RNAi	106166	0	0
CG3980		Cep97	-	RNAi	34774	0	0
CG16708		Cerk	Ceramide kinase	RNAi	101550	0	0
CG15645		cerv	cervantes	RNAi	103221	0	0
CG17446		Cfp1	CXXC finger protein 1	RNAi	47221	0	0
CG10011		CG10011	-	RNAi	45095	1	0
CG10026		CG10026	-	RNAi	107452	0	0
CG10082		CG10082	-	RNAi	103749	0	0
CG10131		CG10131	-	RNAi	BL62272		0
CG10133		CG10133	-	RNAi	18014	0	0
CG10183		CG10183		RNAi	101070		0
CG10194		CG10194	-	RNAi	41170	0	0
CG10195		CG10195	-	RNAi	26771	0	0
CG10209		CG10209	-	RNAi	106002	0	0
CG10237		CG10237	-	RNAi	108388	0	0
CG10265		CG10265	-	RNAi	13974	0	0
CG10268		CG10268	-	RNAi	110640	0	0
CG10274		CG10274	-	RNAi	52407	0	0
CG10300		CG10300	-	RNAi	109472	0	0
CG10336		CG10336	-	RNAi	16019	0	0
CG10338		CG10338	-	RNAi	105770	0	0
CG10362		CG10362	-	RNAi	8317	0	0
CG10376		CG10376	-	RNAi	35473	0	0
CG10383		CG10383	-	RNAi	33911	0	0
CG10399		CG10399	-	RNAi	18617	0	0
CG10420		CG10420	-	RNAi	1753	0	0
CG10462		CG10462	-	RNAi	31247	0	0
CG10463		CG10463	-	RNAi	105142	0	0
CG10466		CG10466	-	RNAi	23368	0	0
CG10584		CG10584	-	RNAi	28681	0	0
CG10602		CG10602	-	RNAi	31281	0	0
CG10631		CG10631	-	RNAi	29378	0	0
CG10646		CG10646	-	RNAi	38397	0	0
CG10654		CG10654	-	RNAi	18658	0	0
CG10681		CG10681	-	RNAi	27304	0	0
CG10702		CG10702	-	RNAi	100842	0	0
CG10721		CG10721	-	RNAi	33098	0	0
CG10737		CG10737	-	RNAi	106383	0	0
CG10747		CG10747	-	RNAi	38403	0	0
CG10803		CG10803	-	RNAi	27318	0	0
CG10822		CG10822	-	RNAi	105317	0	0
CG10834		CG10834	-	RNAi	101818	0	0
CG10845		CG10845	-	RNAi	101178	0	0
CG10859		CG10859	-	RNAi	27322	0	0
CG10866		CG10866	-	RNAi	3234	1	0
CG10880		CG10880	-	RNAi	8591	0	0
CG10907		CG10907	-	RNAi	103623	0	0
CG10912		CG10912	-	RNAi	1445	1	0
CG10924		CG10924	-	RNAi	107092	1	0
CG10932		CG10932	-	RNAi	16099	0	0
CG10939		CG10939	-	RNAi	16958	0	0
CG11069		CG11069	-	RNAi	101080	0	0
CG11095		CG11095	-	RNAi	37911	3	0
CG11122		CG11122	-	RNAi	BL57760		0
CG11162		CG11162	-	RNAi	8326	0	0
CG11170		CG11170	-	RNAi	106277	0	0
CG11178		CG11178	-	RNAi	18178	0	0
CG11208		CG11208	-	RNAi	104378	0	0
CG1126		CG1126	-	RNAi	18200	1	0
CG11307		CG11307	-	RNAi	30050	0	0
CG11367		CG11367	-	RNAi	40900	0	0
CG11396		CG11396	-	RNAi	103546	0	0
CG11425		CG11425	-	RNAi	8458		0
CG11438		CG11438	-	RNAi	BL57523		0
CG11597		CG11597	-	RNAi	38540	0	0
CG11695		CG11695	-	RNAi	BL57246		0
CG11723		CG11723	-	RNAi	39723	0	0
CG11777		CG11777	-	RNAi	104435	0	0
CG11807		CG11807	-	RNAi	108222	0	0
CG11808		CG11808	-	RNAi	16319	1	0
CG11825		CG11825	-	RNAi	BL58199		0
CG11837		CG11837	-	RNAi	38574	0	0
CG11851		CG11851	-	RNAi	3420	0	0
CG11857		CG11857	-	RNAi	23204	0	0
CG11906		CG11906	-	RNAi	16364	0	0
CG11975		CG11975	-	RNAi	26799	0	0
CG11986		CG11986	-	RNAi	20136	0	0
CG12018		CG12018	-	RNAi	108565	0	0
CG12034		CG12034	-	RNAi	107062	0	0
CG12106		CG12106	-	RNAi	16400	0	0
CG12112		CG12112	-	RNAi	44094	0	0
CG12170		CG12170	-	RNAi	31673	0	0
CG1218		CG1218	-	RNAi	103372	0	0
CG12204		CG12204	-	RNAi	17052	2	0
CG12236		CG12236	-	RNAi	BL31949		0
CG12262		CG12262	-	RNAi	BL32436		0
CG12288		CG12288	-	RNAi	BL56037		0
CG12320		CG12320	-	RNAi	17780	0	0
CG12428		CG12428	-	RNAi	108291	1	0
CG12581		CG12581	-	RNAi	21331	0	0
CG12659		CG12659	-	RNAi	31759	0	0
CG12702		CG12702	-	RNAi	24588	0	0
CG1273		CG1273	-	RNAi	4496	0	0
CG12746		CG12746	-	RNAi	33313	0	0
CG12768		CG12768	-	RNAi	105917	0	0
CG12772		CG12772	-	RNAi	109424	0	0
CG12866		CG12866	-	RNAi	101290	0	0
CG12868		CG12868	-	RNAi	32424	1	0
CG12883		CG12883	-	RNAi	110098	2	0
CG12929		CG12929	-	RNAi	4180	1	0
CG12935		CG12935	-	RNAi	47569	0	0
CG12942		CG12942	-	RNAi	32128	1	0
CG12945		CG12945	-	RNAi	100936	1	0
CG13001		CG13001	-	RNAi	42347	1	0
CG13014		CG13014	-	RNAi	6134	0	0
CG13016		CG13016	-	RNAi	37429	0	0
CG13018		CG13018	-	RNAi	101481	0	0
CG13088		CG13088	-	RNAi	23084		0
CG13126		CG13126	-	RNAi	108021	2	0
CG13163		CG13163	-	RNAi	107373	0	0
CG13204		CG13204	-	RNAi	BL31919		0
CG13287		CG13287	-	RNAi	109806	0	0
CG13293		CG13293	-	RNAi	107299	0	0
CG13295		CG13295	-	RNAi	32171	0	0
CG13300		CG13300	-	RNAi	13295	48	0
CG13339		CG13339	-	RNAi	18103	0	0
CG13373		CG13373	-	RNAi	32184	2	0
CG13375		CG13375	-	RNAi	2944	0	0
CG13390		CG13390	-	RNAi	17169	0	0
CG13397		CG13397	-	RNAi	BL51808		0
CG13426		CG13426	-	RNAi	8821	0	0
CG13438		CG13438	-	RNAi	104343	0	0
CG13484		CG13484	-	RNAi	47236	1	0
CG13531		CG13531	-	RNAi	17230	0	0
CG1358		CG1358	-	RNAi	13313	0	0
CG13604		CG13604	-	RNAi	32240	0	0
CG13625		CG13625	-	RNAi	106752	0	0
CG13663		CG13663	-	RNAi	6731	1	0
CG13760		CG13760	-	RNAi	106483	0	0
CG13893		CG13893	-	RNAi	108011	0	0
CG13894		CG13894	-	RNAi	BL27243		0
CG13895		CG13895	-	RNAi	41512	0	0
CG13896		CG13896	-	RNAi	17733	0	0
CG13902		CG13902	-	RNAi	BL33702		0
CG13921		CG13921	-	RNAi	102734	0	0
CG13930		CG13930	-	RNAi	104545	1	0
CG13978		CG13978	-	RNAi	13978R-1	0	0
CG14005		CG14005	-	RNAi	23910	0	0
CG14034		CG14034	-	RNAi	100114	0	0
CG14100		CG14100	-	RNAi	46738	0	0
CG14130		CG14130	-	RNAi	31911	0	0
CG14174		CG14174	-	RNAi	17418	0	0
CG14229		CG14229	-	RNAi	109487	0	0
CG14231		CG14231	-	RNAi	BL54799		0
CG14321		CG14321	-	RNAi	106553	0	0
CG14322		CG14322	-	RNAi	105876	0	0
CG1434		CG1434	-	RNAi	30996	0	0
CG14411		CG14411	-	RNAi	17579	0	0
CG14440		CG14440	-	RNAi	102568	0	0
CG14442		CG14442	-	RNAi	107485	0	0
CG14450		CG14450	-	RNAi	108172	0	0
CG14507		CG14507	-	RNAi	35713	0	0
CG14535		CG14535	-	RNAi	108308	0	0
CG14561		CG14561	-	RNAi	102190	0	0
CG14562		CG14562	-	RNAi	32287	0	0
CG14605		CG14605	-	RNAi	105310	1	0
CG14606		CG14606	-	RNAi	100903	0	0
CG14618		CG14618	-	RNAi	100720	0	0
CG14667		CG14667	-	RNAi	24903	2	0
CG14669		CG14669	-	RNAi	BL36750		0
CG14688		CG14688	-	RNAi	39840	0	0
CG14701		CG14701	-	RNAi	28517	3	0
CG14710		CG14710	-	RNAi	18341	0	0
CG14763		CG14763	-	RNAi	8271	1	0
CG14764		CG14764	-	RNAi	BL62980		0
CG14803		CG14803	-	RNAi	18395	0	0
CG14818		CG14818	-	RNAi	40700		0
CG14838		CG14838	-	RNAi	105707	0	0
CG14905		CG14905	-	RNAi	39848	0	0
CG14907		CG14907	-	RNAi	39851	0	0
CG14945		CG14945	-	RNAi	BL32384		0
CG15011		CG15011	-	RNAi	51958	0	0
CG15073		CG15073	-	RNAi	BL29366		0
CG15107		CG15107	-	RNAi	106898	1	0
CG1513		CG1513	-	RNAi	48600	0	0
CG15269		CG15269	-	RNAi	43655	0	0
CG15312		CG15312	-	RNAi	101286	6	0
CG15317		CG15317	-	RNAi	106426	1	0
CG1532		CG1532	-	RNAi	19398		0
CG15356		CG15356	-	RNAi	BL56911		0
CG15406		CG15406	-	RNAi	105077	1	0
CG15435		CG15435	-	RNAi	39983	0	0
CG15439		CG15439	-	RNAi	19490	0	0
CG15456		CG15456	-	RNAi	23106	0	0
CG15533		CG15533	-	RNAi	42520		0
CG15535		CG15535	-	RNAi	26824	0	0
CG15536		CG15536	-	RNAi	107360	0	0
CG15561		CG15561	-	RNAi	41582	0	0
CG15601		CG15601	-	RNAi	108145	0	0
CG15618		CG15618	-	RNAi	108285	0	0
CG15641		CG15641	-	RNAi	49188	0	0
CG15653		CG15653	-	RNAi	103318	0	0
CG15666		CG15666	-	RNAi	40014	1	0
CG1571		CG1571	-	RNAi	51846	0	0
CG15743		CG15743	-	RNAi	42686	0	0
CG15877		CG15877	-	RNAi	40031	0	0
CG1603		CG1603	-	RNAi	107541	0	0
CG1635		CG1635	-	RNAi	105667		0
CG1647		CG1647	-	RNAi	38917	0	0
CG1657		CG1657	-	RNAi	108453	0	0
CG1663		CG1663	-	RNAi	47484	0	0
CG16704		CG16704	-	RNAi	104956	0	0
CG16896		CG16896	-	RNAi	20316	0	0
CG16904		CG16904	-	RNAi	103434	0	0
CG17026		CG17026	-	RNAi	49200	1	0
CG17027		CG17027	-	RNAi	50075		0
CG17028		CG17028	-	RNAi	32819		0
CG17029		CG17029	-	RNAi	32823		0
CG17141		CG17141	-	RNAi	50242	0	0
CG1718		CG1718	-	RNAi	44449	0	0
CG17180		CG17180	-	RNAi	29141	1	0
CG17187		CG17187	-	RNAi	BL55702		0
CG17249		CG17249	-	RNAi	19170	0	0
CG17265		CG17265	-	RNAi	101468	0	0
CG17266		CG17266	-	RNAi	110097	0	0
CG17294		CG17294	-	RNAi	39105	0	0
CG17322		CG17322	-	RNAi	6384	0	0
CG17490		CG17490	-	RNAi	109973	0	0
CG17544		CG17544	-	RNAi	47935	1	0
CG17721		CG17721	-	RNAi	6036	0	0
CG17821		CG17821	-	RNAi	4997	0	0
CG1792		CG1792	-	RNAi	103243	0	0
CG17929		CG17929	-	RNAi	100093	0	0
CG17930		CG17930	-	RNAi	108912	1	0
CG17982		CG17982	-	RNAi	33035	0	0
CG17985		CG17985	-	RNAi	44908	0	0
CG1806		CG1806	-	RNAi	40956	0	0
CG18109		CG18109	-	RNAi	101222	1	0
CG1812		CG1812	-	RNAi	15491	0	0
CG1824		CG1824	-	RNAi	106935	1	0
CG18262		CG18262	-	RNAi	100213	0	0
CG18265		CG18265	-	RNAi	46038	1	0
CG18327		CG18327	-	RNAi	100920	0	0
CG18428		CG18428	-	RNAi	35638	0	0
CG18528		CG18528	-	RNAi	108671	0	0
CG18596		CG18596	-	RNAi	41674	0	0
CG18609		CG18609	-	RNAi	4994	0	0
CG18661		CG18661	-	RNAi	109334	0	0
CG18766		CG18766	-	RNAi	104275	0	0
CG18870		CG18870	-	RNAi	3471	0	0
CG1896		CG1896	-	RNAi	20733	0	0
CG1907		CG1907	-	RNAi	1341	0	0
CG1998		CG1998	-	RNAi	37395	0	0
CG2006		CG2006	-	RNAi	109100	2	0
CG2187		CG2187	-	RNAi	101065	0	0
CG2201		CG2201	-	RNAi	33502		0
CG2202		CG2202	-	RNAi	101872	0	0
CG2211		CG2211	-	RNAi	7433	0	0
CG2247		CG2247	-	RNAi	43417	0	0
CG2278		CG2278	-	RNAi	47010	0	0
CG2371		CG2371	-	RNAi	15482	0	0
CG2540		CG2540	-	RNAi	33536	0	0
CG2543		CG2543	-	RNAi	25417	0	0
CG2616		CG2616	-	RNAi	11052	1	0
CG2617		CG2617	-	RNAi	106224	0	0
CG2694		CG2694	-	RNAi	BL61848		0
CG2781		CG2781	-	RNAi	102543	0	0
CG2906		CG2906	-	RNAi	25449	0	0
CG2911		CG2911	-	RNAi	25451	0	0
CG2974		CG2974	-	RNAi	32484	0	0
CG30008		CG30008	-	RNAi	6760	0	0
CG30051		CG30051	-	RNAi	43067	1	0
CG30080		CG30080	-	RNAi	104054	0	0
CG30089		CG30089	-	RNAi	10038	0	0
CG3009		CG3009	-	RNAi	12216	0	0
CG30158		CG30158	-	RNAi	32434	0	0
CG30183		CG30183	-	RNAi	107441	0	0
CG3021		CG3021	-	RNAi	25601	0	0
CG30339		CG30339	-	RNAi	104772	0	0
CG30344		CG30344	-	RNAi	7378	0	0
CG30345		CG30345	-	RNAi	103652	0	0
CG3036		CG3036	-	RNAi	108500	0	0
CG3038		CG3038	-	RNAi	35573	0	0
CG30392		CG30392	-	RNAi	12862	0	0
CG30394		CG30394	-	RNAi	3470	0	0
CG30428		CG30428	-	RNAi	24774	0	0
CG30440		CG30440	-	RNAi	21177	0	0
CG30496		CG30496	-	RNAi	110548	0	0
CG30503		CG30503	-	RNAi	9036	0	0
CG3077		CG3077	-	RNAi	109618	1	0
CG31100		CG31100	-	RNAi	42627	0	0
CG31109		CG31109	-	RNAi	38858	0	0
CG31121		CG31121	-	RNAi	43981	0	0
CG31140		CG31140	-	RNAi	27193	0	0
CG31142		CG31142	-	RNAi	106114	0	0
CG31148		CG31148	-	RNAi	14698	0	0
CG3121		CG3121	-	RNAi	106848	1	0
CG31249		CG31249	-	RNAi	43740	0	0
CG31275		CG31275	-	RNAi	49957		0
CG31278		CG31278	-	RNAi	38938	0	0
CG31360		CG31360	-	RNAi	37469	0	0
CG31368		CG31368	-	RNAi	110348	0	0
CG31388		CG31388	-	RNAi	108280	0	0
CG31414		CG31414	-	RNAi	101212	0	0
CG31457		CG31457	-	RNAi	25765	0	0
CG31510		CG31510	-	RNAi	6266	0	0
CG31522		CG31522	-	RNAi	106652	0	0
CG3156		CG3156	-	RNAi	105646	0	0
CG31633		CG31633	-	RNAi	102918	0	0
CG3164		CG3164	-	RNAi	42733	0	0
CG31668		CG31668	-	RNAi	104093	0	0
CG3168		CG3168	-	RNAi	48010	1	0
CG31729		CG31729	-	RNAi	105987	0	0
CG31731		CG31731	-	RNAi	31731R-2		0
CG31787		CG31787	-	RNAi	6372	1	0
CG31793		CG31793	-	RNAi	8069	0	0
CG31826		CG31826	-	RNAi	100639	1	0
CG3184		CG3184	-	RNAi	108988	0	0
CG31875		CG31875	-	RNAi	104638	0	0
CG31886		CG31886	-	RNAi	2830	0	0
CG3191		CG3191	-	RNAi	109512	1	0
CG31915		CG31915	-	RNAi	37942	0	0
CG31935		CG31935	-	RNAi	31935R-2		0
CG31957		CG31957	-	RNAi	25926	0	0
CG31999		CG31999	-	RNAi	29153	0	0
CG32022		CG32022	-	RNAi	100506	0	0
CG32039		CG32039	-	RNAi	102916	0	0
CG32053		CG32053	-	RNAi	107225	0	0
CG32082		CG32082	-	RNAi	21438	1	0
CG32095		CG32095	-	RNAi	107726	0	0
CG32105		CG32105	-	RNAi	51269	0	0
CG32109		CG32109	-	RNAi	107659	0	0
CG32150		CG32150	-	RNAi	21669	0	0
CG32202		CG32202	-	RNAi	26325	0	0
CG32221		CG32221	-	RNAi	21672	0	0
CG32232		CG32232	-	RNAi	34466	0	0
CG32243		CG32243	-	RNAi	34471	0	0
CG32264		CG32264	-	RNAi	101503	0	0
CG32365		CG32365	-	RNAi	104119	1	0
CG32371		CG32371	-	RNAi	24735	1	0
CG32392		CG32392	-	RNAi	100592	1	0
CG32396		CG32396	-	RNAi	41896	0	0
CG32407		CG32407	-	RNAi	26131	0	0
CG32442		CG32442	-	RNAi	6481	0	0
CG32486		CG32486	-	RNAi	BL35465		0
CG32506		CG32506	-	RNAi	BL28776		0
CG3253		CG3253	-	RNAi	26159	1	0
CG32533		CG32533	-	RNAi	BL55255		0
CG32537		CG32537	-	RNAi	44077	71	0
CG32576		CG32576	-	RNAi	109542	3	0
CG3267		CG3267	-	RNAi	13259	0	0
CG32758		CG32758	-	RNAi	28457	0	0
CG32809		CG32809	-	RNAi	26282	0	0
CG3281		CG3281	-	RNAi	26170	0	0
CG3285		CG3285	-	RNAi	52669	0	0
CG32856		CG32856	-	RNAi	103501	0	0
CG32944		CG32944	-	RNAi	103642	0	0
CG33052		CG33052	-	RNAi	108793	0	0
CG33061		CG33061	-	RNAi	13057R-3		0
CG3309		CG3309	-	RNAi	110363	0	0
CG33090		CG33090	-	RNAi	28033	1	0
CG33107		CG33107	-	RNAi	102391	0	0
CG33110		CG33110	-	RNAi	BL44519		0
CG33116		CG33116	-	RNAi	9308	0	0
CG33124		CG33124	-	RNAi	105570	0	0
CG33228		CG33228	-	RNAi	BL55372		0
CG33233		CG33233	-	RNAi	106897	0	0
CG33298		CG33298	-	RNAi	BL51841		0
CG33310		CG33310	-	RNAi	15274R-1		0
CG33331		CG33331	-	RNAi	107669	0	0
CG33494		CG33494	-	RNAi	47112	0	0
CG33543		CG33543	-	RNAi	17859	0	0
CG33671		CG33671	-	RNAi	BL35300	multiple targets	0
CG3376		CG3376	-	RNAi	12227	1	0
CG33969		CG33969	-	RNAi	22159	0	0
CG33970		CG33970	-	RNAi	101855	0	0
CG34039		CG34039	-	RNAi	BL60018		0
CG3408		CG3408	-	RNAi	36306		0
CG34195		CG34195	-	RNAi	34311	0	0
CG34229		CG34229	-	RNAi	BL35019		0
CG3430		CG3430	-	RNAi	40444	0	0
CG3434		CG3434	-	RNAi	45130	0	0
CG34347		CG34347	-	RNAi	18066	0	0
CG34348		CG34348	-	RNAi	106956	0	0
CG3437		CG3437	-	RNAi	34222	0	0
CG34371		CG34371	-	RNAi	44997	0	0
CG34376		CG34376	-	RNAi	102795	1	0
CG34380		CG34380	-	RNAi	39447	0	0
CG34383		CG34383	-	RNAi	38787	0	0
CG34404		CG34404	-	RNAi	103335	0	0
CG3491		CG3491	-	RNAi	107845	0	0
CG3511		CG3511	-	RNAi	21735	0	0
CG3530		CG3530	-	RNAi	26217		0
CG3618		CG3618	-	RNAi	6977	0	0
CG3632		CG3632	-	RNAi	26254		0
CG3649		CG3649	-	RNAi	3649R-1		0
CG3679		CG3679	-	RNAi	34674	0	0
CG3699		CG3699	-	RNAi	101959	0	0
CG3795		CG3795	-	RNAi	105053	0	0
CG3831		CG3831	-	RNAi	7405	0	0
CG3860		CG3860	-	RNAi	109804	3	0
CG3862		CG3862	-	RNAi	34721	0	0
CG3894		CG3894	-	RNAi	108408	0	0
CG3919		CG3919	-	RNAi	109787	0	0
CG3961		CG3961	-	RNAi	37305	0	0
CG3995		CG3995	-	RNAi	26069	0	0
CG4004		CG4004	-	RNAi	33044	0	0
CG40178		CG40178	-	RNAi	110089	0	0
CG4036		CG4036	-	RNAi	26370	0	0
CG4041		CG4041	-	RNAi	108887	0	0
CG4049		CG4049	-	RNAi	101670	0	0
CG4074		CG4074	-	RNAi	39758	1	0
CG4089		CG4089	-	RNAi	1608	0	0
CG4096		CG4096	-	RNAi	108353	1	0
CG4098		CG4098	-	RNAi	14265	0	0
CG4133		CG4133	-	RNAi	44192	0	0
CG42232		CG42232	-	RNAi	43599	0	0
CG42237		CG42237	-	RNAi	37389	0	0
CG42271		CG42271	-	RNAi	BL29411		0
CG42321		CG42321	-	RNAi	8136	1	0
CG42342		CG42342	-	RNAi	24934	0	0
CG42372		CG42372	-	RNAi	48945	1	0
CG42404		CG42404	-	RNAi	26491	0	0
CG42445		CG42445	-	RNAi	BL42760		0
CG42507		CG42507	-	RNAi	BL62191		0
CG42541		CG42541	-	RNAi	100179	1	0
CG42554		CG42554	-	RNAi	17730	1	0
CG42565		CG42565	-	RNAi	17227	0	0
CG42668		CG42668	-	RNAi	104813	0	0
CG42684		CG42684	-	RNAi	23432	0	0
CG4282		CG4282	-	RNAi	BL26313		0
CG4291		CG4291	-	RNAi	21820	1	0
CG4294		CG4294	-	RNAi	40501	0	0
CG4301		CG4301	-	RNAi	6125	0	0
CG43759		CG43759	-	RNAi	104617	0	0
CG43980		CG43980	-	RNAi	48294	0	0
CG44014		CG44014	-	RNAi	2693	0	0
CG4415		CG4415	-	RNAi	34839	0	0
CG45186		CG45186	-	RNAi	43583	0	0
CG45263		CG45263	-	RNAi	18706	0	0
CG4557		CG4557	-	RNAi	51263	1	0
CG4562		CG4562	-	RNAi	106975	2	0
CG4586		CG4586	-	RNAi	21886	0	0
CG4594		CG4594	-	RNAi	13284	0	0
CG4607		CG4607	-	RNAi	5450	0	0
CG4611		CG4611	-	RNAi	21898	0	0
CG4617		CG4617	-	RNAi	BL25993		0
CG4707		CG4707	-	RNAi	26606	0	0
CG4709		CG4709	-	RNAi	21923	1	0
CG4788		CG4788	-	RNAi	BL58215		0
CG4813		CG4813	-	RNAi	21950	1	0
CG4820		CG4820	-	RNAi	21953	0	0
CG4860		CG4860	-	RNAi	34900	0	0
CG4907		CG4907	-	RNAi	6833	0	0
CG4908		CG4908	-	RNAi	BL51863		0
CG4935		CG4935	-	RNAi	12563	0	0
CG4942		CG4942	-	RNAi	42888	0	0
CG4953		CG4953	-	RNAi	41214	0	0
CG4957		CG4957	-	RNAi	45535	1	0
CG4995		CG4995	-	RNAi	106173	0	0
CG5009		CG5009	-	RNAi	103761	0	0
CG5013		CG5013	-	RNAi	48108	0	0
CG5022		CG5022	-	RNAi	8262	0	0
CG5023		CG5023	-	RNAi	106355	0	0
CG5026		CG5026	-	RNAi	34915	0	0
CG5039		CG5039	-	RNAi	39229	2	0
CG5065		CG5065	-	RNAi	101744	0	0
CG5087		CG5087	-	RNAi	106663	1	0
CG5098		CG5098	-	RNAi	BL62000		0
CG5118		CG5118	-	RNAi	34937	0	0
CG5171		CG5171	-	RNAi	108686	0	0
CG5188		CG5188	-	RNAi	34320	0	0
CG5199		CG5199	-	RNAi	27372	1	0
CG5262		CG5262	-	RNAi	BL51755		0
CG5265		CG5265	-	RNAi	104754	0	0
CG5270		CG5270	-	RNAi	27390	0	0
CG5274		CG5274	-	RNAi	22046	0	0
CG5281		CG5281	-	RNAi	109498	0	0
CG5290		CG5290	-	RNAi	22057	0	0
CG5316		CG5316	-	RNAi	25953	0	0
CG5326		CG5326	-	RNAi	47681	0	0
CG5342		CG5342	-	RNAi	44403	0	0
CG5377		CG5377	-	RNAi	BL53977		0
CG5439		CG5439	-	RNAi	109602	1	0
CG5447		CG5447	-	RNAi	21566	0	0
CG5466		CG5466	-	RNAi	104522	0	0
CG5521		CG5521	-	RNAi	110722	0	0
CG5543		CG5543	-	RNAi	27454	0	0
CG5608		CG5608	-	RNAi	45569	0	0
CG5611		CG5611	-	RNAi	100466	0	0
CG5645		CG5645	-	RNAi	BL61346		0
CG5704		CG5704	-	RNAi	42044	0	0
CG5727		CG5727	-	RNAi	108041	0	0
CG5731		CG5731	-	RNAi	15543	1	0
CG5734		CG5734	-	RNAi	43798	0	0
CG5745		CG5745	-	RNAi	35036	0	0
CG5757		CG5757	-	RNAi	27504	0	0
CG5789		CG5789	-	RNAi	1204	1	0
CG5815		CG5815	-	RNAi	22203	0	0
CG5846		CG5846	-	RNAi	21645	0	0
CG5853		CG5853	-	RNAi	100782	1	0
CG5872		CG5872	-	RNAi	100035	0	0
CG5885		CG5885	-	RNAi	BL60126		0
CG5888		CG5888	-	RNAi	12413	0	0
CG5919		CG5919	-	RNAi	103636	0	0
CG5973		CG5973	-	RNAi	24998	0	0
CG5984		CG5984	-	RNAi	52489	0	0
CG5991		CG5991	-	RNAi	25483	1	0
CG6034		CG6034	-	RNAi	105780	0	0
CG6066		CG6066	-	RNAi	35064	0	0
CG6073		CG6073	-	RNAi	16594	0	0
CG6118		CG6118	-	RNAi	102587	0	0
CG6125		CG6125	-	RNAi	107894	0	0
CG6144		CG6144	-	RNAi	41847	0	0
CG6178		CG6178	-	RNAi	1172	0	0
CG6182		CG6182	-	RNAi	14705	0	0
CG6254		CG6254	-	RNAi	22482	0	0
CG6299		CG6299	-	RNAi	46105	0	0
CG6308		CG6308	-	RNAi	30273	0	0
CG6310		CG6310	-	RNAi	8699	0	0
CG6321		CG6321	-	RNAi	27584	0	0
CG6325		CG6325	-	RNAi	35072	0	0
CG6345		CG6345	-	RNAi	27588	0	0
CG6404		CG6404	-	RNAi	108091	1	0
CG6409		CG6409	-	RNAi	14115	1	0
CG6425		CG6425	-	RNAi	35097	0	0
CG6488		CG6488	-	RNAi	104383	0	0
CG6550		CG6550	-	RNAi	4947	0	0
CG6565		CG6565	-	RNAi	39006	2	0
CG6567		CG6567	-	RNAi	27667	0	0
CG6613		CG6613	-	RNAi	42065	0	0
CG6621		CG6621	-	RNAi	27695	0	0
CG6654		CG6654	-	RNAi	BL62183		0
CG6664		CG6664	-	RNAi	12779	0	0
CG6685		CG6685	-	RNAi	105033	0	0
CG6707		CG6707	-	RNAi	110291	0	0
CG6746		CG6746	-	RNAi	46513	0	0
CG6790		CG6790	-	RNAi	12135	0	0
CG6805		CG6805	-	RNAi	107728	0	0
CG6841		CG6841	-	RNAi	34253	0	0
CG6845		CG6845	-	RNAi	107719	0	0
CG6927		CG6927	-	RNAi	104345	0	0
CG6928		CG6928	-	RNAi	106739	0	0
CG6971		CG6971	-	RNAi	103573	1	0
CG6984		CG6984	-	RNAi	21650	0	0
CG7009		CG7009	-	RNAi	27789	0	0
CG7028		CG7028	-	RNAi	27808		0
CG7054		CG7054	-	RNAi	40415	1	0
CG7065		CG7065	-	RNAi	BL32449		0
CG7120		CG7120	-	RNAi	27860	0	0
CG7130		CG7130	-	RNAi	44395	0	0
CG7133		CG7133	-	RNAi	27876	0	0
CG7149		CG7149	-	RNAi	102304	0	0
CG7156		CG7156	-	RNAi	26035	0	0
CG7168		CG7168	-	RNAi	27894	0	0
CG7183		CG7183	-	RNAi	109461	0	0
CG7276		CG7276	-	RNAi	107115	0	0
CG7324		CG7324	-	RNAi	BL32929		0
CG7326		CG7326	-	RNAi	26739	0	0
CG7369		CG7369	-	RNAi	100824	0	0
CG7407		CG7407	-	RNAi	108035	0	0
CG7497		CG7497	-	RNAi	106421	0	0
CG7550		CG7550	-	RNAi	35254	0	0
CG7565		CG7565	-	RNAi	36290	0	0
CG7655		CG7655	-	RNAi	105286	0	0
CG7692		CG7692	-	RNAi	BL32338		0
CG7702		CG7702	-	RNAi	40879	0	0
CG7706		CG7706	-	RNAi	103727	1	0
CG7716		CG7716	-	RNAi	25526	0	0
CG7718		CG7718	-	RNAi	109405	0	0
CG7737		CG7737	-	RNAi	49437	0	0
CG7741		CG7741	-	RNAi	33655	0	0
CG7742		CG7742	-	RNAi	25536	0	0
CG7744		CG7744	-	RNAi	33246	0	0
CG7745		CG7745	-	RNAi	25539	0	0
CG7747		CG7747	-	RNAi	BL56975		0
CG7763		CG7763	-	RNAi	39949	0	0
CG7789		CG7789	-	RNAi	BL51028		0
CG7794		CG7794	-	RNAi	104265	0	0
CG7800		CG7800	-	RNAi	27121	0	0
CG7810		CG7810	-	RNAi	22565	1	0
CG7824		CG7824	-	RNAi	22568	0	0
CG7837		CG7837	-	RNAi	22573	0	0
CG7840		CG7840	-	RNAi	110567	0	0
CG7879		CG7879	-	RNAi	15260	1	0
CG7882		CG7882	-	RNAi	109918	0	0
CG7974		CG7974	-	RNAi	28074	1	0
CG7979		CG7979	-	RNAi	BL62235		0
CG7988		CG7988	-	RNAi	22650	0	0
CG7997		CG7997	-	RNAi	16840	1	0
CG8005		CG8005	-	RNAi	22664	0	0
CG8009		CG8009	-	RNAi	48955	0	0
CG8027		CG8027	-	RNAi	109400	0	0
CG8032		CG8032	-	RNAi	28175	1	0
CG8036		CG8036	-	RNAi	105633	0	0
CG8078		CG8078	-	RNAi	11107	0	0
CG8097		CG8097	-	RNAi	28199	1	0
CG8112		CG8112	-	RNAi	37345	1	0
CG8142		CG8142	-	RNAi	108452	1	0
CG8176		CG8176	-	RNAi	25034	0	0
CG8187		CG8187	-	RNAi	24230	0	0
CG8195		CG8195	-	RNAi	103635	0	0
CG8202		CG8202	-	RNAi	35408	0	0
CG8219		CG8219	-	RNAi	8219R-1		0
CG8239		CG8239	-	RNAi	24254	0	0
CG8270		CG8270	-	RNAi	106201	0	0
CG8272		CG8272	-	RNAi	24261	0	0
CG8273		CG8273	-	RNAi	28885	0	0
CG8281		CG8281	-	RNAi	24274	0	0
CG8306		CG8306	-	RNAi	23136	0	0
CG8319		CG8319	-	RNAi	110491	0	0
CG8366		CG8366	-	RNAi	46322	0	0
CG8388		CG8388	-	RNAi	BL57545		0
CG8407		CG8407	-	RNAi	100696	0	0
CG8412		CG8412	-	RNAi	5934	0	0
CG8468		CG8468	-	RNAi	6452	0	0
CG8500		CG8500	-	RNAi	104416	2	0
CG8519		CG8519	-	RNAi	24117	1	0
CG8569		CG8569	-	RNAi	35962	1	0
CG8611		CG8611	-	RNAi	28936	0	0
CG8641		CG8641	-	RNAi	110183	0	0
CG8679		CG8679	-	RNAi	30778	0	0
CG8726		CG8726	-	RNAi	40719	1	0
CG8800		CG8800	-	RNAi	42118	1	0
CG8837		CG8837	-	RNAi	100670	0	0
CG8858		CG8858	-	RNAi	BL34975		0
CG8866		CG8866	-	RNAi	103725	0	0
CG8907		CG8907	-	RNAi	28987		0
CG8908		CG8908	-	RNAi	100472	1	0
CG8944		CG8944	-	RNAi	BL53889		0
CG9068		CG9068	-	RNAi	107864	0	0
CG9121		CG9121	-	RNAi	110251	0	0
CG9125		CG9125	-	RNAi	101165	1	0
CG9149		CG9149	-	RNAi	108623	0	0
CG9170		CG9170	-	RNAi	29066	0	0
CG9213		CG9213	-	RNAi	101717	0	0
CG9267		CG9267	-	RNAi	2879	0	0
CG9279		CG9279	-	RNAi	105109	0	0
CG9308		CG9308	-	RNAi	6606	1	0
CG9313		CG9313	-	RNAi	106167	0	0
CG9319		CG9319	-	RNAi	104862	0	0
CG9346		CG9346	-	RNAi	BL56898		0
CG9356		CG9356	-	RNAi	108394	0	0
CG9384		CG9384	-	RNAi	14169	0	0
CG9389		CG9389	-	RNAi	44663	0	0
CG9391		CG9391	-	RNAi	23723	0	0
CG9422		CG9422	-	RNAi	30171	0	0
CG9458		CG9458	-	RNAi	102418	0	0
CG9459		CG9459	-	RNAi	102715	0	0
CG9527		CG9527	-	RNAi	107289	0	0
CG9577		CG9577	-	RNAi	110267	0	0
CG9596		CG9596	-	RNAi	27026	0	0
CG9609		CG9609	-	RNAi	BL34030		0
CG9664		CG9664	-	RNAi	42465	0	0
CG9684		CG9684	-	RNAi	24090	0	0
CG9752		CG9752	-	RNAi	50280	0	0
CG9784		CG9784	-	RNAi	30098	0	0
CG9804		CG9804	-	RNAi	46579	0	0
CG9886		CG9886	-	RNAi	48079	0	0
CG9914		CG9914	-	RNAi	106649	0	0
CG9948		CG9948	-	RNAi	29429	1	0
CG9981		CG9981	-	RNAi	11566	0	0
CG9986		CG9986	-	RNAi	110352	1	0
CG32435		chb	chromosome bows	RNAi	108620	0	0
CG33320		CheB38a	Chemosensory protein B 38a	RNAi	105043	0	0
CG33321		CheB38b	Chemosensory protein B 38b	RNAi	104635	0	0
CG14405		CheB38c	Chemosensory protein B 38c	RNAi	102486	0	0
CG33348		CheB42a	Chemosensory protein B 42a	RNAi	106020	0	0
CG33351		CheB42b	Chemosensory protein B 42b	RNAi	103796	0	0
CG33350		CheB42c	Chemosensory protein B 42c	RNAi	23314	0	0
CG33524		CheB53b	Chemosensory protein B 53b	RNAi	102541	0	0
CG15503		CheB93a	Chemosensory protein B 93a	RNAi	35622	0	0
CG31438		CheB93b	Chemosensory protein B 93b	RNAi	39139	0	0
CG14531		CheB98a	Chemosensory protein A 98a	RNAi	31149	1	0
CG3937		cher	cheerio	RNAi	107451	0	0
CG9553		chic	chickadee	RNAi	102759	0	0
CG5229		chm	chameau	RNAi	5684	0	0
CG4108		Chmp1	Charged multivesicular body protein 1	RNAi	21788	1	0
CG4618		CHMP2B	Charged multivesicular body protein 2b	RNAi	BL50942		0
CG3564		CHOp24	CHOp24	RNAi	7039	0	0
CG6198		CHORD	CHORD	RNAi	22300	0	0
CG3044		Cht11	Cht11	RNAi	BL42927		0
CG2125		ci	cubitus interruptus	RNAi	2125R-1	0	0
CG4944		cib	ciboulot	RNAi	21549	0	0
CG13329		cid	centromere identifier	RNAi	43856	0	0
CG31012		cindr	CIN85 and CD2AP orthologue	RNAi	38854	5	0
CG15015		Cip4	Cdc42-interacting protein 4	RNAi	18492	0	0
CG8639		Cirl	Calcium-independent receptor for alpha-latrotoxin	RNAi	100749	1	0
CG7595		ck	crinkled	RNAi	9265	0	0
CG3217		CkIIalpha-i3	CKII-alpha subunit interactor-3	RNAi	102373	0	0
CG12424		ckn	caskin	RNAi	25222	0	0
CG3738		Cks30A	Cyclin-dependent kinase subunit 30A	RNAi	108401	0	0
CG11847		Clbn	Caliban	RNAi	38578	0	0
CG6948		Clc	Clathrin light chain	RNAi	106632	1	0
CG10997		Clic	Chloride intracellular channel	RNAi	28303	0	0
CG5020		CLIP-190	Cytoplasmic linker protein 190	RNAi	107176	0	0
CG9858		clt	cricklet	RNAi	BL50683		0
CG3035		cm	carmine	RNAi	21139	1	0
CG6392		cmet	CENP-meta	RNAi	35081	0	0
CG5690		Cnb	Centrobin	RNAi	28651	0	0
CG43286		cnc	cap-n-collar	RNAi	37674	0	0
CG5855		cni	cornichon	RNAi	102019	0	0
CG17262		cnir	cornichon related	RNAi	104009	0	0
CG42312		cno	canoe	RNAi	102686	0	0
CG31716		Cnot4	Cnot 4 homologue	RNAi	110472	0	0
CG31040		Cog7	Cog7	RNAi	105468	0	0
CG8710		coil	coilin	RNAi	36009	0	0
CG4145		Col4a1	Collagen type IV alpha 1	RNAi	28369	0	0
CG17943		comm	commissureless	RNAi	17943R-6	0	0
CG7554		comm2	comm2	RNAi	7554R-2	0	0
CG1618		comt	comatose	RNAi	105552	1	0
CG7503		Con	Connectin	RNAi	101187	0	0
CG1084		Cont	Contactin	RNAi	28294	0	0
CG17082		conu	conundrum	RNAi	104232	0	0
CG1621		Coop	Corepressor of Pangolin	RNAi	108055	0	0
CG11949		cora	coracle	RNAi	9787		0
CG42278		corn	cornetto	RNAi	104594	0	0
CG9446		coro	coro	RNAi	109644	0	0
CG3637		Cortactin	Cortactin	RNAi	105289	1	0
CG1708		cos	costa	RNAi	108914	0	0
CG14617		Cp110	-	RNAi	24874	0	0
CG10540		cpa	capping protein alpha	RNAi	18648	0	0
CG17158		cpb	capping protein beta	RNAi	45668	1	0
CG10110		Cpsf160	Cleavage and polyadenylation specificity factor 160	RNAi	18009	0	0
CG7698		Cpsf73	Cleavage and polyadenylation specificity factor 73	RNAi	39557	0	0
CG32490		cpx	complexin	RNAi	21477		0
CR31044		CR31044	-	RNAi	BL28653		0
CR32207		CR32207	-	RNAi	39368	7	0
CG10546		Cralbp	Cellular retinaldehyde binding protein	RNAi	31258	0	0
CG1041		CRAT	Carnitine O-Acetyl-Transferase	RNAi	BL52921		0
CG6383		crb	crumbs	RNAi	39178	0	0
CG8669		crc	cryptocephal	RNAi	109014	0	0
CG1587		Crk	Crk oncogene	RNAi	19061	0	0
CG4280		crq	croquemort	RNAi	45883	0	0
CG42317		Csk	C-terminal Src kinase	RNAi	32877		0
CG7697		CstF-64	Cleavage stimulation factor 64 kilodalton subunit	RNAi	21045	2	0
CG17678		cta	concertina	RNAi	BL51848		0
CG6998		ctp	cut up	RNAi	109084	0	0
CG3977		Ctr1A	Copper transporter 1A	RNAi	46757	0	0
CG7459		Ctr1B	Copper transporter 1B	RNAi	5805	0	0
CG15671		cv-2	crossveinless 2	RNAi	109915	0	0
CG5940		CycA	Cyclin A	RNAi	32421		0
CG3510		CycB	Cyclin B	RNAi	43772	0	0
CG5814		CycB3	Cyclin B3	RNAi	22200	0	0
CG3938		CycE	Cyclin E	RNAi	47941		0
CG5603		CYLD	cylindromatosis ortholog (H. sapiens)	RNAi	101414	0	0
CG11715		Cyp4g15	Cyp4g15	RNAi	8034	0	0
CG10248		Cyp6a8	Cytochrome P450-6a8	RNAi	4884	1	0
CG12800		Cyp6d4	Cyp6d4	RNAi	10251	0	0
CG5893		D	Dichaete	RNAi	BL34672		0
CG14622		DAAM	Dishevelled Associated Activator of Morphogenesis	RNAi	24885	1	0
CG4952		dac	dachshund	RNAi	2942	1	0
CG6157		dah	discontinuous actin hexagon	RNAi	104912	0	0
CG4974		dally	division abnormally delayed	RNAi	14136	1	0
CG13651		danr	distal antenna-related	RNAi	11515	1	0
CG12029		dar1	dendritic arbor reduction 1	RNAi	26980		0
CG8380		DAT	Dopamine transporter	RNAi	12082	1	0
CG3561		Dbp21E2	DEAD box protein 21E2	RNAi	43773	0	0
CG11371		dbr	debra	RNAi	102855	0	0
CG5370		Dcp-1	Death caspase-1	RNAi	34330	0	0
CG4792		Dcr-1	Dicer-1	RNAi	24667	0	0
CG9206		DCTN1-p150	Dynactin 1, p150 subunit	RNAi	3785	0	0
CG10846		DCTN5-p25	Dynactin 5, p25 subunit	RNAi	8057	1	0
CG1696		Dd	Dullard	RNAi	12941	0	0
CG33531		Ddr	Discoidin domain receptor	RNAi	51448		0
CG18176		defl	deflated	RNAi	20604	0	0
CG5887		Desat1	Desaturase 1	RNAi	5887R-4	0	0
CG5925		Desat2	Desaturase 2	RNAi	5925R-1	0	0
CG12265		Det	Deterin	RNAi	43112	0	0
CG2189		Dfd	Deformed	RNAi	50110	2	0
CG8657		Dgkepsilon	Diacyl glycerol kinase epsilon	RNAi	4659	0	0
CG10981		dgrn	degringolade	RNAi	16150	0	0
CG16969		dgt2	dim gamma-tubulin 2	RNAi	BL31729		0
CG3221		dgt3	dim gamma-tubulin 3	RNAi	34448	0	0
CG8828		dgt5	dim gamma-tubulin 5	RNAi	26912	1	0
CG12370		Dh44-R2	Diuretic hormone 44 receptor 2	RNAi	102292	0	0
CG4625		Dhap-at	Dihydroxyacetone phosphate acyltransferase	RNAi	1429	0	0
CG5526		Dhc36C	Dynein heavy chain at 36C	RNAi	27451	0	0
CG15804		Dhc62B	Dynein heavy chain at 62B	RNAi	101226	0	0
CG7507		Dhc64C	Dynein heavy chain 64C	RNAi	28054	0	0
CG3723		Dhc93AB	Dynein heavy chain at 93AB	RNAi	108658	0	0
CG1842		Dhc98D	Dynein heavy chain at 89D	RNAi	101704	0	0
CG1768		dia	diaphanous	RNAi	20518	6	0
CG12284		Diap1	Death-associated inhibitor of apoptosis 1	RNAi	BL33597		0
CG12028		dib	disembodied	RNAi	16827		0
CG7051		Dic61B	Dynein intermediate chain at 61B	RNAi	101248	1	0
CG2146		didum	dilute class unconventional myosin	RNAi	44291	0	0
CG1625		dila	dilatory	RNAi	32668	0	0
CG9908		disco	disconnected	RNAi	7001	4	0
CG3619		Dl	Delta	RNAi	3720	0	0
CG1725		dlg1	discs large 1	RNAi	1725R-2		0
CG1938		Dlic	Dynein light intermediate chain	RNAi	101340	0	0
CG9771		Dlip2	Dorsal interacting protein 2	RNAi	3149	0	0
CG3629		Dll	Distal-less	RNAi	101750	0	0
CG5304		dmGlut	Dietary and metabolic glutamate transporter	RNAi	6938	0	0
CG15504		dmrt99B	doublesex-Mab related 99B	RNAi	105019	0	0
CG8374		dmt	dalmatian	RNAi	100550	0	0
CG6053		Dnai2	dynein, axonemal, intermediate chain 2	RNAi	108601	0	0
CG5602		DNA-ligI	DNA ligase I	RNAi	106463	1	0
CG17559		dnt	doughnut on 2	RNAi	106056	1	0
CG42320		Doa	Darkener of apricot	RNAi	19066		0
CG5560		dob	doppelganger von brummer	RNAi	14814	0	0
CG5133		Doc1	Dorsocross1	RNAi	16747	0	0
CG2079		Dok	Downstream of kinase	RNAi	108544	0	0
CG6498		dop	drop out	RNAi	109282	0	0
CG18314		DopEcR	Dopamine/Ecdysteroid receptor	RNAi	103494	0	0
CG3093		dor	deep orange	RNAi	33733	1	0
CG1616		dpa	disc proliferation abnormal	RNAi	1616R-1	0	0
CG9885		dpp	decapentaplegic	RNAi	BL36779		0
CG13140		dpr19	defective proboscis extension response 19	RNAi	42789	0	0
CG1897		Dr	Drop	RNAi	110625	5	0
CG9414		Drep4	DNA fragmentation factor-related protein 4	RNAi	30479	0	0
CG7788		Drice	Death related ICE-like caspase	RNAi	7788R-2		0
CG17348		drl	derailed	RNAi	100039	0	0
CG10016		drm	drumstick	RNAi	102405	0	0
CG3365		drongo	drongo	RNAi	109801	1	0
CG3210		Drp1	Dynamin related protein 1	RNAi	44155	0	0
CG17941		ds	dachsous	RNAi	36219	0	0
CG17800		Dscam1	Down syndrome cell adhesion molecule 1	RNAi	36233	0	0
CG42330		Dscam4	Down syndrome cell adhesion molecule 4	RNAi	23488	0	0
CG18361		dsh	dishevelled	RNAi	101525	0	0
CG3929		dx	deltex	RNAi	106086	0	0
CG15013		dyl	dusky-like	RNAi	102166	0	0
CG9930		E5	E5	RNAi	47794	0	0
CG3525		eas	easily shocked	RNAi	103784	0	0
CG3265		Eb1	Eb1	RNAi	24451	1	0
CG2904		ec	echinus	RNAi	106671	0	0
CG33104		eca	eclair	RNAi	49750	0	0
CG8598		eco	Establishment of cohesion	RNAi	35982	0	0
CG1765		EcR	Ecdysone receptor	RNAi	37059		0
CG1765		EcR	Ecdysone receptor	RNAi	1765R-4		0
CG12676		ed	echinoid	RNAi	937	0	0
CG15085		edl	ETS-domain lacking	RNAi	51819	1	0
CG31158		Efa6	Exchange factor for Arf 6 ortholog (H. sapiens)	RNAi	42321	0	0
CG31159		EF-G2	Elongation Factor G2	RNAi	104187	0	0
CG10079		Egfr	Epidermal growth factor receptor	RNAi	10079R-2		0
CG4051		egl	egalitarian	RNAi	104141	0	0
CG9006		Egm	Enigma	RNAi	BL36739		0
CG12919		egr	eiger	RNAi	108814	0	0
CG4153		eIF-2beta	Eukaryotic initiation factor 2beta	RNAi	BL53268		0
CG8127		Eip75B	Ecdysone-induced protein 75B	RNAi	108399	0	0
CG18389		Eip93F	Ecdysone-induced protein 93F	RNAi	104390	2	0
CG4262		elav	embryonic lethal abnormal vision	RNAi	37915	3	0
CG32072		Elo68alpha	Elongase 68alpha	RNAi	BL58210		0
CG11801		Elo68beta	Elongase 68beta	RNAi	103506	1	0
CG16905		eloF	elongase F	RNAi	48663	1	0
CG11887		Elp2	Elongator complex protein 2	RNAi	BL57580		0
CG15433		Elp3	Elongator complex protein 3	RNAi	106128	0	0
CG13387		emb	embargoed	RNAi	3347	0	0
CG1007		emc	extra macrochaetae	RNAi	1007R-1	0	0
CG2988		ems	empty spiracles	RNAi	BL50673		0
CG9015		en	engrailed	RNAi	35697		0
CG15112		ena	enabled	RNAi	39034		0
CG14296		EndoA	Endophilin A	RNAi	24618	0	0
CG6513		endos	endosulfine	RNAi	106825	0	0
CG14299		Epg5	ectopic P-granules autophagy protein 5	RNAi	110420	0	0
CG9543		epsilonCOP	Coat Protein (coatomer) epsilon	RNAi	24059	2	0
CG32703		Erk7	Extracellularly regulated kinase 7	RNAi	109661	0	0
CG7404		ERR	estrogen-related receptor	RNAi	108349	0	0
CG14941		esc	extra sexcombs	RNAi	5690	0	0
CG3758		esg	escargot	RNAi	BL42846		0
CG12140		Etf-QO	Electron transfer flavoprotein-ubiquinone oxidoreductase	RNAi	15508	0	0
CG18105		ETH	Ecdysis triggering hormone	RNAi	18825	0	0
CG6338		Ets97D	Ets at 97D	RNAi	BL35749		0
CG11727		Evi5	Ecotropic viral integration site 5 ortholog (H. sapiens)	RNAi	17549	0	0
CG7127		Exo70	Exo70 ortholog (S. cerevisiae)	RNAi	103717	0	0
CG8433		Ext2	Ext2	RNAi	BL52883		0
CG1464		ey	eyeless	RNAi	42845	0	0
CG9554		eya	eyes absent	RNAi	43911	0	0
CG10488		eyg	eyegone	RNAi	2952	5	0
CG30502		fa2h	fatty acid 2-hydroylase	RNAi	110538	1	0
CG6355		fab1	-	RNAi	27591	0	0
CG1945		faf	fat facets	RNAi	30679		0
CG10023		Fak	Focal adhesion kinase	RNAi	17957	2	0
CG12812		Fancl	Fancl	RNAi	32025	0	0
CG17716		fas	faint sausage	RNAi	42236	5	0
CG5803		Fas3	Fasciclin 3	RNAi	26850	0	0
CG3523		FASN1	Fatty acid synthase 1	RNAi	108339	0	0
CG3524		FASN2	Fatty acid synthase 2	RNAi	105855	0	0
CG17374		FASN3	Fatty acid synthase 3	RNAi	BL63026		0
CG4609		fax	failed axon connections	RNAi	21895	0	0
CG5725		fbl	fumble	RNAi	101437	0	0
CG9144		Fbw5	F-box and WD repeat domain containing 5	RNAi	27007	3	0
CG1839		Fbxl4	F box and leucine-rich-repeat gene 4	RNAi	15475	0	0
CG12252		Fcp1	TFIIF-interacting CTD phosphatase	RNAi	38640	0	0
CG3668		fd59A	forkhead domain 59A	RNAi	37637	0	0
CG4205		Fdx1	Ferredoxin 1	RNAi	6987	0	0
CG1319		Fdx2	Ferredoxin 2	RNAi	39792	0	0
CG8648		Fen1	Flap endonuclease 1	RNAi	15699	0	0
CG8874		FER	FER ortholog (H. sapiens)	RNAi	36053	1	0
CG5952		Fer2	48 related 2	RNAi	17851	0	0
CG8971		fh	frataxin homolog	RNAi	108812	2	0
CG42610		Fhos	Formin homology 2 domain containing ortholog	RNAi	34034	0	0
CG9888		Fib	Fibrillarin	RNAi	104372	0	0
CG9523		Fic	Fic domain-containing protein	RNAi	105634	0	0
CG34368		Fili	Fish-lips	RNAi	44532	0	0
CG10002		fkh	fork head	RNAi	37062	5	0
CG1484		fliI	flightless I	RNAi	39528	0	0
CG7445		fln	flightin	RNAi	46153	1	0
CG32593		Flo2	Flotillin 2	RNAi	31525	0	0
CG10724		flr	flare	RNAi	22851	0	0
CG6203		Fmr1	Fmr1	RNAi	8933	0	0
CG6817		foi	fear-of-intimacy	RNAi	10102	0	0
CG12389		Fpps	Farnesyl pyrophosphate synthase	RNAi	104362	0	0
CG9526		frj	farjavit	RNAi	51451	0	0
CG32138		Frl	Formin-like	RNAi	34413	0	0
CG5907		Frq2	Frequenin 2	RNAi	49870	1	0
CG17657		frtz	fritz	RNAi	103611	2	0
CG12765		fsd	fates-shifted	RNAi	17308	0	0
CG3352		ft	fat	RNAi	9396	0	0
CG6551		fu	fused	RNAi	27663	0	0
CG17608		fu12	fu12	RNAi	51079	1	0
CG9233		fu2	fu2	RNAi	106386	0	0
CG10772		Fur1	Furin 1	RNAi	22853	1	0
CG7004		fwd	four wheel drive	RNAi	27786	0	0
CG6549		fws	four way stop	RNAi	110378	1	0
CG17697		fz	frizzled	RNAi	43075	0	0
CG9739		fz2	frizzled 2	RNAi	443990	0	0
CG4626		fz4	frizzled 4	RNAi	5451	0	0
CG4568		fzo	fuzzy onions	RNAi	1407	0	0
CG10986		g	garnet	RNAi	41369	0	0
CG2995		G9a	G9a	RNAi	25473	0	0
CG10060		Galphai	G protein alpha i subunit	RNAi	28150	0	0
CG2204		Galphao	G protein alpha o subunit	RNAi	19124	0	0
CG2835		Galphas	G protein alpha s subunit	RNAi	24958	0	0
CG33145		GalT1	beta1,3-galactosyltransferase 1	RNAi	7394	0	0
CG3988		gammaSnap1	gamma Soluble NSF attachment protein 1	RNAi	100738	0	0
CG6208		gammaSnap2	gamma Soluble NSF attachment protein 2	RNAi	105575	0	0
CG3157		gammaTub23C	gamma-Tubulin at 23C	RNAi	19130	1	0
CG17566		gammaTub37C	gamma-Tubulin at 37C	RNAi	25271	1	0
CG7112		GAPcenA	GTPase activating protein and centrosome-associated ortholog (H. sapiens)	RNAi	35174	0	0
CG5978		GAPsec	GTPase activating protein, SECIS-dependent read-through	RNAi	21001	0	0
CG6007		GatA	Glutamyl-tRNA(Gln) amidotransferase, subunit A	RNAi	106175	0	0
CG5562		gbb	glass bottom boat	RNAi	BL34898		0
CG10545		Gbeta13F	G protein beta-subunit 13F	RNAi	100011	0	0
CG3532		GCC185	GCC185 ortholog (H. sapiens)	RNAi	26221	1	0
CG42739		gce	germ cell-expressed bHLH-PAS	RNAi	47465	0	0
CG5169		GckIII	Germinal centre kinase III	RNAi	49558	0	0
CG30115		GEFmeso	Guanine nucleotide exchange factor in mesoderm	RNAi	39952	0	0
CG4012		gek	genghis khan	RNAi	107207	0	0
CG1106		Gel	Gelsolin	RNAi	37865	0	0
CG10419		Gem2	Gemin2	RNAi	47372	0	0
CG6539		Gem3	Gemin3	RNAi	49506	0	0
CG3002		Gga	Golgi-localized, gamma-adaptin ear containing, ARF binding protein	RNAi	3270	1	0
CG8261		Ggamma1	G protein gamma 1	RNAi	28844	0	0
CG7891		Gie	GTPase indispensable for equal segregation of chromosomes	RNAi	26085	0	0
CG6975		gig	gigas	RNAi	103417	0	0
CG1583		GIIIspla2	-	RNAi	8928	0	0
CG12734		Girdin	Girdin	RNAi	32008	0	0
CG6963		gish	gilgamesh	RNAi	26003		0
CG4604		GLaz	Glial Lazarillo	RNAi	15387	0	0
CG3881		GlcAT-S	GlcAT-S	RNAi	42781	0	0
CG6575		glec	gliolectin	RNAi	6575R-3		0
CG6575		glec	gliolectin	RNAi	6575R-1		0
CG3903		Gli	Gliotactin	RNAi	37115		0
CG11397		glu	gluon	RNAi	10937	2	0
CG3853		Glut3	Glucose transporter type 3	RNAi	13302	0	0
CG34360		Glut4EF	-	RNAi	16265		0
CG33206		Gmap	Golgi microtubule-associated protein	RNAi	50009	0	0
CG3495		Gmer	GDP-4-keto-6-deoxy-D-mannose 3,5-epimerase/4-reductase	RNAi	26208	0	0
CG6895		GNBP1	Gram-negative bacteria binding protein 1	RNAi	107100	0	0
CG5008		GNBP3	Gram-negative bacteria binding protein 3	RNAi	37256	0	0
CG9634		goe	gone early	RNAi	42820	0	0
CG4925		Golgin104	Golgin 104	RNAi	45142	2	0
CG3493		Golgin245	Golgin-245 ortholog (H. sapiens)	RNAi	40450	1	0
CG17785		Golgin84	Golgin-84 ortholog (H. sapiens)	RNAi	1181	0	0
CG8090		GPHR	Golgi pH Regulator	RNAi	30339	0	0
CG32578		Gpi1	Gpi1	RNAi	107774	0	0
CG40129		Gprk1	G protein-coupled receptor kinase 1	RNAi	BL28354		0
CG8948		Graf	GRAF ortholog (H. sapiens)	RNAi	42165	0	0
CG42311		grh	grainy head	RNAi	106879	0	0
CG4345		grim	grim	RNAi	22597	1/333	0
CG9201		Grip128	Grip128	RNAi	29074	0	0
CG5688		Grip163	Grip163	RNAi	27482	0	0
CG10346		Grip71	Grip71	RNAi	31228	0	0
CG6176		Grip75	Grip75	RNAi	30131	0	0
CG3917		Grip84	Gamma-tubulin ring protein 84	RNAi	105640	0	0
CG17610		grk	gurken	RNAi	3121	0	0
CG9656		grn	grain	RNAi	105192	0	0
CG8384		gro	groucho	RNAi	6316	0	0
CG17161		grp	grapes	RNAi	110076	0	0
CG1743		Gs2	Glutamine synthetase 2	RNAi	32929		0
CG9362		GstZ1	Glutathione S transferase Z1	RNAi	24012	0	0
CG2522		Gtp-bp	GTP-binding protein	RNAi	14877	0	0
CG6494		h	hairy	RNAi	6494R-2	0	0
CG7428		halo	halo	RNAi	100388	0	0
CG31753		ham	hamlet	RNAi	40763	0	0
CG10186		Hasp	Hig-anchoring scaffold protein	RNAi	101250	1	0
CG7449		hbs	hibris	RNAi	9471	0	0
CG14670		Hcs	Holocarboxylase synthetase	RNAi	32301	1	0
CG5837		Hem	HEM-protein	RNAi	22207	0	0
CG4353		hep	hemipterous	RNAi	2968	1	0
CG31000		heph	hephaestus	RNAi	33735	0	0
CG4694		her	hermaphrodite	RNAi	103967	0	0
CG13475		HGTX	HGTX	RNAi	12608	0	0
CG4637		hh	hedgehog	RNAi	1402	1	0
CG10971		Hip1	Huntingtin interacting protein 1	RNAi	16138	0	0
CG3379		His4r	Histone H4 replacement	RNAi	BL34816		0
CG32592		hiw	highwire	RNAi	26998	0	0
CG10367		Hmgcr	HMG Coenzyme A reductase	RNAi	10367R-3	0	0
CG4311		Hmgs	HMG Coenzyme A synthase	RNAi	26504	0	0
CG4225		Hmt-1	Heavy metal tolerance factor 1	RNAi	4225R-1		0
CG9310		Hnf4	Hepatocyte nuclear factor 4	RNAi	12692	1	0
CG8359		hng2	hinge2	RNAi	105177	0	0
CG10653		hook	hook	RNAi	35483		0
CG10293		how	held out wings	RNAi	100775	1	0
CG7097		hppy	happyhour	RNAi	103580	0	0
CG4966		HPS4	Hermansky-Pudlak Syndrome 4 ortholog (H. sapiens)	RNAi	24688	0	0
CG2903		Hrs	Hepatocyte growth factor regulated tyrosine kinase substrate	RNAi	BL34086		0
CG3194		Hsepi	Heparan sulfate C5-epimerase	RNAi	7333	0	0
CG11055		Hsl	Hormone-sensitive lipase ortholog	RNAi	18686	1	0
CG17117		hth	homothorax	RNAi	100630	0	0
CG43443		hts	hu li tai shao	RNAi	106577	0	0
CG8436		Ibf1	Insulator binding factor 1	RNAi	35426	0	0
CG10566		ICA69	ICA69	RNAi	27281	0	0
CG7176		Idh	Isocitrate dehydrogenase	RNAi	42915	0	0
CG9623		if	inflated	RNAi	44885		0
CG4201		IKKbeta	I-kappaB kinase beta	RNAi	26427	0	0
CG10504		Ilk	Integrin linked kinase	RNAi	16062	0	0
CG5933		Ime4	Inducer of meiosis 4	RNAi	20968	0	0
CG12090		Iml1	Increased minichromosome loss 1	RNAi	16390	0	0
CG12165		Incenp	Inner centromere protein	RNAi	101123	0	0
CG33933		Indy-2	I'm not dead yet 2	RNAi	50694	0	0
CG6632		Ing3	Inhibitor of growth family, member 3	RNAi	109799	1	0
CG31212		Ino80	INO80 complex subunit	RNAi	BL33708		0
CG11143		Inos	Inos	RNAi	100763	0	0
CG10426		INPP5E	Inositol polyphosphate 5-phosphatase E	RNAi	16048		0
CG18402		InR	Insulin-like receptor	RNAi	992	0	0
CG11312		insc	inscuteable	RNAi	31488	0	0
CG4785		IntS14	Integrator 14	RNAi	21947	0	0
CG5859		IntS8	Integrator 8	RNAi	45677	0	0
CG5222		IntS9	Integrator 9	RNAi	27380	1	0
CG17835		inv	invected	RNAi	101934	2	0
CG3953		Invadolysin	Invadolysin	RNAi	16416	0	0
CG1448		Inx3	Innexin 3	RNAi	108913	0	0
CG45017		IP3K2	Inositol 1,4,5-triphosphate kinase 2	RNAi	102730	0	0
CG3028		Ipp	Inositol polyphosphate 1-phosphatase	RNAi	25615		0
CG10101		Ir84a	Ionotropic receptor 84a	RNAi	44548	1	0
CG16827		ItgaPS4	Integrin alphaPS4 subunit	RNAi	37172	1	0
CG5372		ItgaPS5	Integrin alphaPS5 subunit	RNAi	5372R-2	0	0
CG1762		Itgbn	Integrin betanu subunit	RNAi	1762R-1	0	0
CG8873		jet	jetlag	RNAi	104399	0	0
CG17330		jhamt	juvenile hormone acid methyltransferase	RNAi	19172	0	0
CG8165		JHDM2	JmjC domain-containing histone demethylase 2	RNAi	BL32975		0
CG15101		Jheh1	Juvenile hormone epoxide hydrolase 1	RNAi	103249	0	0
CG12317		JhI-21	JhI-21	RNAi	45193	1	0
CG2275		Jra	Jun-related antigen	RNAi	107997		0
CG11063		jub	Ajuba LIM protein	RNAi	101993	0	0
CG31363		Jupiter	Jupiter	RNAi	25045	0	0
CG32397		jv	javelin	RNAi	103870	0	0
CG45760		JYalpha	JYalpha	RNAi	106410	0	0
CG17181		Kah	Kahuli	RNAi	BL51517		0
CG11759		Kap3	Kinesin associated protein 3	RNAi	103548	1	0
CG1193		kat-60L1	katanin p60-like 1	RNAi	108168	0	0
CG5183		KdelR	KDEL receptor	RNAi	9236	0	0
CG15835		Kdm4A	Lysine (K)-specific demethylase 4A	RNAi	107868	0	0
CG7210		kel	kelch	RNAi	105397	0	0
CG8183		Khc-73	Kinesin heavy chain 73	RNAi	105984	0	0
CG9913		Kif19A	Kinesin family member 19A ortholog	RNAi	106569	0	0
CG17461		Kif3C	Kinesin family member 3C ortholog	RNAi	43641	1	0
CG3653		kirre	kin of irre	RNAi	27227	0	0
CG17629		kl-3	male fertility factor kl3	RNAi	32971	0	0
CG17046		klar	klarsicht	RNAi	32836	2	0
CG5433		Klc	Kinesin light chain	RNAi	22125	1	0
CG1453		Klp10A	Kinesin-like protein at 10A	RNAi	41534	0	0
CG5300		Klp31E	Kinesin-like protein at 31E	RNAi	34983	0	0
CG9191		Klp61F	Kinesin-like protein at 61F	RNAi	109280	0	0
CG10642		Klp64D	Kinesin-like protein at 64D	RNAi	103358	1	0
CG7293		Klp68D	Kinesin-like protein at 68D	RNAi	27943	0	0
CG5658		Klp98A	Kinesin-like protein at 98A	RNAi	40603	0	0
CG12296		klu	klumpfuss	RNAi	12296R-3	0	0
CG10197		kn	knot	RNAi	103837	0	0
CG10275		kon	kon-tiki	RNAi	37283	0	0
CG15707		krimp	krimper	RNAi	BL37511		0
CG32179		Krn	Keren	RNAi	6119	0	0
CG12008		kst	karst	RNAi	37075	1	0
CG9398		ktub	king tubby	RNAi	29110		0
CG7749		kug	kugelei	RNAi	3749	0	0
CG4749		l(2)10685	lethal (2) 10685	RNAi	21941	0	0
CG15266		l(2)35Cc	lethal (2) 35Cc	RNAi	51825	0	0
CG4713		l(2)gd1	lethal (2) giant discs 1	RNAi	BL27311		0
CG13951		l(2)k10201	lethal (2) k10201	RNAi	108881	0	0
CG4084		l(2)not	lethal (2) neighbor of tid	RNAi	110803	0	0
CG11238		l(3)04053	lethal (3) 04053	RNAi	31463	0	0
CG8793		l(3)76BDm	lethal (3) 76BDm	RNAi	36033	1	0
CG6930		l(3)neo38	lethal (3) neo38	RNAi	35145	1	0
CG12369		Lac	Lachesin	RNAi	35524	0	0
CG4162		lace	lace	RNAi	21805	0	0
CG6944		Lam	Lamin	RNAi	45636	3	0
CG10119		LamC	Lamin C	RNAi	BL31621		0
CG10236		LanA	Laminin A	RNAi	18873	0	0
CG3322		LanB2	Laminin B2	RNAi	42559	0	0
CG2520		lap	like-AP180	RNAi	105767	0	0
CG10255		Lap1	Lap1	RNAi	18600	0	0
CG42569		Larp7	La related protein 7	RNAi	31635	5	0
CG5231		Las	Lipoic acid synthase	RNAi	22037	1	0
CG3849		Lasp	Lasp	RNAi	109416	1	0
CG32711		lawc	leg arista wing complex	RNAi	103446	0	0
CG11440		laza	lazaro	RNAi	42592		0
CG8434		lbk	lambik	RNAi	4319	0	0
CG6570		lbl	ladybird late	RNAi	52323	0	0
CG4674		Leash	Leash	RNAi	26597	0	0
CG7479		LeuRS-m	Leucyl-tRNA synthetase, mitochondrial	RNAi	45048	0	0
CG12244		lic	licorne	RNAi	106822	0	0
CG17227		lig3	DNA ligase III	RNAi	13330	0	0
CG1848		LIMK1	LIM domain kinase 1	RNAi	25343	0	0
CG17334		lin-28	lin-28	RNAi	BL50679		0
CG8440		Lis-1	Lissencephaly-1	RNAi	6216	0	0
CG9374		Lkb1	Lkb1 kinase	RNAi	108356	0	0
CG5248		loco	locomotion defects	RNAi	9248	1	0
CG10733		loj	logjam	RNAi	BL57702		0
CG16778		lov	jim lovell	RNAi	10739	3	0
CG11335		lox	lysyl oxidase-like	RNAi	107435	0	0
CG11335		lox	lysyl oxidase-like	RNAi	11335R-3		0
CG4402		lox2	lysyl oxidase-like 2	RNAi	33252	0	0
CG32699		LPCAT	Lysophosphatidylcholine acyltransferase	RNAi	32924	0	0
CG8709		Lpin	Lipin	RNAi	107707	0	0
CG5591		Lpt	Lost PHDs of trr	RNAi	22170	0	0
CG8532		lqf	liquid facets	RNAi	35949	1	0
CG6098		Lrr47	Leucine-rich repeat 47	RNAi	27566	0	0
CG5483		Lrrk	Leucine-rich repeat kinase	RNAi	105630	0	0
CG11136		Lrt	Leucine-rich tendon-specific protein	RNAi	105555	0	0
CG9057		Lsd-2	Lipid storage droplet-2	RNAi	40734	0	0
CG12938		Lsm10	Lsm10	RNAi	38754	0	0
CG6637		lsn	larsen	RNAi	110350	1	0
CG18028		lt	light	RNAi	109990		0
CG32372		ltl	larval translucida	RNAi	18977	2	0
CG33473		luna	luna	RNAi	102196	1	0
CG6450		lva	lava lamp	RNAi	106476	1	0
CG7540		M6	M6	RNAi	101757	0	0
CG4746		mab-21	mab-21	RNAi	100700	0	0
CG2072		Mad1	-	RNAi	BL52930		0
CG40196		Maf1	-	RNAi	109142	0	0
CG9401		mago	mago nashi	RNAi	28132	0	0
CG1483		Map205	Microtubule-associated protein 205	RNAi	39690	0	0
CG1825		Map60	Microtubule-associated protein 60	RNAi	1825R-1		0
CG5784		Mapmodulin	Mapmodulin	RNAi	100283	0	0
CG17064		mars	mars	RNAi	32841	0	0
CG7614		Mat1	Menage a trois 1 ortholog (H. sapiens)	RNAi	104780	2	0
CG10379		mbc	myoblast city	RNAi	10379R-1	0	0
CG18582		mbt	mushroom bodies tiny	RNAi	109880	0	0
CG10181		Mdr65	Multi drug resistance 65	RNAi	9019	0	0
CG31991		mdy	midway	RNAi	6367	0	0
CG5465		MED16	Mediator complex subunit 16	RNAi	14916	1	0
CG3695		MED23	Mediator complex subunit 23	RNAi	105247	1	0
CG7999		MED24	Mediator complex subunit 24	RNAi	15878	0	0
CG12254		MED25	Mediator complex subunit 25	RNAi	108249	0	0
CG1429		Mef2	Myocyte enhancer factor 2	RNAi	15550	1	0
CG14781		mei-38	meiotic 38	RNAi	51805	0	0
CG4252		mei-41	meiotic 41	RNAi	103624	0	0
CG8474		Meics	Meiotic central spindle	RNAi	51284	0	0
CG7717		Mekk1	Mekk1	RNAi	25529	0	0
CG8624		melt	melted	RNAi	105110	0	0
CG4780		Membrin	Membrin	RNAi	44535	0	0
CG14228		Mer	Merlin	RNAi	7161	1	0
CG4903		MESR4	Misexpression suppressor of ras 4	RNAi	21976	1	0
CG1705		Met	Methoprene-tolerant	RNAi	45852	1	0
CG7818		Mettl14	Methyltransferase like 14	RNAi	13542	0	0
CG1771		mew	multiple edematous wings	RNAi	44890	0	0
CG6803		Mf	Myofilin	RNAi	49117	0	0
CG3415		Mfe2	peroxisomal Multifunctional enzyme type 2	RNAi	34613	0	0
CG15095		MFS14	Major Facilitator Superfamily Transporter 14	RNAi	11117	0	0
CG4726		MFS3	Major Facilitator Superfamily Transporter 3	RNAi	4726R-3		0
CG31045		Mhcl	Myosin heavy chain-like	RNAi	BL51456		0
CG43227		milt	milton	RNAi	41508	0	0
CG11120		Mink	Mitotic spindle and nuclear protein	RNAi	107351	0	0
CG5508		mino	minotaur	RNAi	1316	0	0
CG7074		mio	missing oocyte	RNAi	108609	0	0
CG6061		mip120	Myb-interacting protein 120	RNAi	35060	0	0
CG3480		mip130	Myb-interacting protein 130	RNAi	26205	0	0
CG18321		miple2	midkine and pleiotrophin 2	RNAi	102644	0	0
CG4123		Mipp1	Multiple inositol polyphosphate phosphatase 1	RNAi	8493		0
CG4317		Mipp2	Multiple inositol polyphosphate phosphatase 2	RNAi	14163	0	0
CG5410		Miro	Mitochondrial Rho	RNAi	106683	0	0
CG10601		mirr	mirror	RNAi	22841	0	0
CG18156		Mis12	Mis12	RNAi	19097	1	0
CG6455		Mitofilin	Mitofilin	RNAi	106757	1	0
CG9738		Mkk4	MAP kinase kinase 4	RNAi	26928	1	0
CG2184		Mlc2	Myosin light chain 2	RNAi	51201	0	0
CG3476		MME1	Mitochondrial Magnesium Exporter 1	RNAi	2734	0	0
CG1794		Mmp2	Matrix metalloproteinase 2	RNAi	107888	1	0
CG4946		Mob3	-	RNAi	21551	0	0
CG3403		Mob4	-	RNAi	40442	1	0
CG10701		Moe	Moesin	RNAi	37917	0	0
CG3025		mof	males absent on the first	RNAi	105370	0	0
CG11926		Mon1	Mon1 ortholog	RNAi	103378	2	0
CG8683		mon2	-	RNAi	25835	0	0
CG4322		moody	moody	RNAi	1800	0	0
CG9311		mop	myopic	RNAi	104860	1	0
CG9250		Mpp6	M-phase phosphoprotein 6	RNAi	48546	0	0
CG8889		Mppe	Metallophosphoesterase	RNAi	108190	0	0
CG7643		Mps1	Monopolar spindle 1	RNAi	110572	0	0
CG3060		mr	morula	RNAi	2993	0	0
CG5705		mRF1	mitochondrial translation release factor 1	RNAi	19855	0	0
CG15871		mRpL38	mitochondrial ribosomal protein L38	RNAi	43691	1	0
CG32296		Mrtf	Myocardin-related transcription factor	RNAi	103917	1	0
CG9066		MSBP	membrane steroid binding protein	RNAi	45185	0	0
CG13914		msd1	mitotic spindle density 1	RNAi	50460	0	0
CG2213		msd5	mitotic spindle density 5	RNAi	21713	1	0
CG7003		Msh6	Msh6	RNAi	108076	0	0
CG42768		Msp300	Muscle-specific protein 300 kDa	RNAi	40143	0	0
CG5000		msps	mini spindles	RNAi	21982	0	0
CG1424		mst	misato	RNAi	110422	0	0
CG17946		Mst84Da	Male-specific RNA 84Da	RNAi	109196	1	0
CG17934		Mst84Db	Male-specific RNA 84Db	RNAi	108421	2	0
CG17945		Mst84Dc	Male-specific RNA 84Dc	RNAi	42407	0	0
CG17935		Mst84Dd	Male-specific RNA 84Dd	RNAi	108516	1	0
CG6851		Mtch	Mitochondrial carrier homolog 1	RNAi	44305	0	0
CG5047		mTerf3	-	RNAi	26692	0	0
CG7175		mTerf5	-	RNAi	27900	0	0
CG4521		mthl1	methuselah-like 1	RNAi	BL41930		0
CG6965		mthl5	methuselah-like 5	RNAi	3390	0	0
CG5588		Mtl	Mig-2-like	RNAi	108427	0	0
CG9115		mtm	myotubularin	RNAi	29032	0	0
CG8274		Mtor	Megator	RNAi	8274R-1	0	0
CG9342		Mtp	Microsomal triacylglycerol transfer protein	RNAi	110414	0	0
CG7109		mts	microtubule star	RNAi	35171	0	0
CG7795		mtsh	mitoshell	RNAi	3247	0	0
CG12047		mud	mushroom body defect	RNAi	BL35044		0
CG31873		Mulk	Multi-substrate lipid kinase	RNAi	36374	1	0
CG42863		mv	mauve	RNAi	109676	0	0
CG43772		mwh	multiple wing hairs	RNAi	41514		0
CG2078		Myd88	Myd88	RNAi	25402	0	0
CG1838		myo	myoglianin	RNAi	33132		0
CG43657		Myo10A	Myosin 10A	RNAi	33486	0	0
CG6976		Myo28B1	Myosin 28B1	RNAi	37531	2	0
CG9155		Myo61F	Myosin 61F	RNAi	49345	1	0
CG45784		Myo81F	Myosin 81F	RNAi	40781	0	0
CG5501		Myo95E	Myosin 95E	RNAi	51207		0
CG7593		Naa40	N(alpha)-acetyltransferase 40	RNAi	108124	0	0
CG9620		nac	neuronally altered carbohydrate	RNAi	42623	0	0
CG9940		Nadsyn	NAD synthetase	RNAi	40756	0	0
CG6754		nbs	nbs	RNAi	28215	0	0
CG4357		Ncc69	sodium chloride cotransporter 69	RNAi	BL28682		0
CG7831		ncd	non-claret disjunctional	RNAi	22570	0	0
CG18660		Nckx30C	Nckx30C	RNAi	51459	0	0
CG6751		nclb	no child left behind	RNAi	12576		0
CG7012		nct	nicastrin	RNAi	BL57497		0
CG9160		ND-ACP	NADH dehydrogenase (ubiquinone) acyl carrier protein	RNAi	43502	0	0
CG40002		ND-AGGG	NADH dehydrogenase (ubiquinone) AGGG subunit	RNAi	109239	2	0
CG12400		ND-B14.5B	NADH dehydrogenase (ubiquinone) B14.5 B subunit	RNAi	37463		0
CG12908		Ndg	Nidogen/entactin	RNAi	13280	1	0
CG10718		neb	nebbish	RNAi	108138	0	0
CG9655		nes	nessy	RNAi	37309	0	0
CG10722		nesd	nessun dorma	RNAi	BL35009		0
CG18657		NetA	Netrin-A	RNAi	18657R-2	0	0
CG44328		Neto	Neuropilin and tolloid-like	RNAi	19594	0	0
CG11988		neur	neuralized	RNAi	10662	0	0
CG9347		ninaB	neither inactivation nor afterpotential B	RNAi	104683	0	0
CG6728		ninaG	ninaG	RNAi	BL57386		0
CG11614		nkd	naked cuticle	RNAi	3004	4	0
CG13772		Nlg2	Neuroligin 2	RNAi	44237	1	0
CG5395		nmd	no mitochondrial derivative	RNAi	34999	0	0
CG7892		nmo	nemo	RNAi	104885	0	0
CG13434		Nnf1a	Nnf1a	RNAi	109867	0	0
CG1763		nod	no distributive disjunction	RNAi	48150	0	0
CG8145		nom	numerous disordered muscles	RNAi	35840	0	0
CG6713		Nos	Nitric oxide synthase	RNAi	27722	x	0
CG42388		Nost	Nostrin	RNAi	40328	1	0
CG13076		Notum	Notum	RNAi	103775	0	0
CG7291		Npc2a	Niemann-Pick type C-2a	RNAi	30725	0	0
CG3153		Npc2b	Niemann-Pick type C-2b	RNAi	16653	0	0
CG12813		Npc2d	Niemann-Pick type C-2d	RNAi	31095	1	0
CG31410		Npc2e	Niemann-Pick type C-2e	RNAi	28595	0	0
CG11315		Npc2h	Niemann-Pick type C-2h	RNAi	38273	1	0
CG9104		Nprl2	Nitrogen permease regulator-like 2	RNAi	10472		0
CG8783		Nprl3	Nitrogen permease regulator-like 3	RNAi	40721	0	0
CG1634		Nrg	Neuroglian	RNAi	27202	0	0
CG4007		Nrk	Neurospecific receptor kinase	RNAi	9653	0	0
CG9258		nrv1	nervana 1	RNAi	46542	0	0
CG9261		nrv2	nervana 2	RNAi	2660	0	0
CG6827		Nrx-IV	Neurexin IV	RNAi	8353	0	0
CG10627		nst	nesthocker	RNAi	31298	0	0
CG17248		nSyb	neuronal Synaptobrevin	RNAi	49202	0	0
CG34395		nub	nubbin	RNAi	105044	0	0
CG8104		nudE	nudE	RNAi	100713	1	0
CG33991		nuf	nuclear fallout	RNAi	109426	3	0
CG8902		Nuf2	Nuf2	RNAi	100235	0	0
CG14426		nullo	nullo	RNAi	106743	1	0
CG3779		numb	numb	RNAi	3779R-1		0
CG8722		Nup44A	Nucleoporin at 44A	RNAi	BL38357		0
CG31634		Oatp26F	Organic anion transporting polypeptide 26F	RNAi	2650	1	0
CG7571		Oatp74D	Organic anion transporting polypeptide 74D	RNAi	37295	0	0
CG5205		obe	obelus	RNAi	107282	0	0
CG12154		oc	ocelliless	RNAi	BL34327		0
CG3573		Ocrl	Oculocerebrorenal syndrome of Lowe	RNAi	34649	0	0
CG3039		ogre	optic ganglion reduced	RNAi	103816	0	0
CG12673		olf413	olf413	RNAi	104097	0	0
CG5545		Oli	Olig family	RNAi	13057	1	0
CG1133		opa	odd paired	RNAi	BL34704		0
CG8479		Opa1	Optic atrophy 1 ortholog (H. sapiens)	RNAi	106290	0	0
CG43782		orb2	-	RNAi	107153	0	0
CG3041		Orc2	Origin recognition complex subunit 2	RNAi	107035	0	0
CG2917		Orc4	Origin recognition complex subunit 4	RNAi	104335	0	0
CG7833		Orc5	Origin recognition complex subunit 5	RNAi	108885	0	0
CG1584		Orc6	Origin recognition complex subunit 6	RNAi	10677	0	0
CG13610		Orct2	Organic cation transporter 2	RNAi	106681	0	0
CG7467		osa	osa	RNAi	7810		0
CG6708		Osbp	Oxysterol binding protein	RNAi	108252	0	0
CG7161		Oseg1	Outer segment 1	RNAi	35186	0	0
CG13809		Oseg2	Outer segment 2	RNAi	107157	0	0
CG8967		otk	off-track	RNAi	104688	0	0
CG8964		otk2	off-track2	RNAi	3075	0	0
CG18445		oys	oysgedart	RNAi	4040	0	0
CG9770		p	pink	RNAi	43462	0	0
CG1422		p115	p115	RNAi	103350	0	0
CG1967		p24-1	p24-related-1	RNAi	100594	1	0
CG33338		p38c	p38c MAP kinase	RNAi	105173	0	0
CG11139		p47	p47	RNAi	17529	0	0
CG15860		pain	painless	RNAi	39478	0	0
CG14895		Pak3	Pak3	RNAi	39844		0
CG3428		pall	pallbearer	RNAi	41938	0	0
CG9754		Panx	Panoramix	RNAi	102702	0	0
CG8201		par-1	par-1	RNAi	52556	0	0
CG5884		par-6	par-6	RNAi	19730	1	0
CG9907		para	paralytic	RNAi	6131	0	0
CG2864		Parg	Poly(ADP-ribose) glycohydrolase	RNAi	23962	0	0
CG40411		Parp	Poly-(ADP-ribose) polymerase	RNAi	46745	0	0
CG32528		parvin	parvin	RNAi	11670	0	0
CG1800		pasha	partner of drosha	RNAi	BL33972		0
CG10695		Pat1	Protein interacting with APP tail-1	RNAi	27308	0	0
CG3424		path	pathetic	RNAi	44536	0	0
CG33130		Patronin	Patronin	RNAi	108927	1	0
CG1258		pav	pavarotti	RNAi	46137	0	0
CG31794		Pax	Paxillin	RNAi	107789	0	0
CG31481		pb	proboscipedia	RNAi	105751	0	0
CG8114		pbl	pebble	RNAi	35349	0	0
CG42515		Pbp49	PSEA-binding protein 49kD	RNAi	38519	0	0
CG14779		pck	pickel	RNAi	50307	1	0
CG10262		PCNA2	Proliferating cell nuclear antigen 2	RNAi	37672	0	0
CG3443		pcx	pecanex	RNAi	14934	0	0
CG17888		Pdp1	PAR-domain protein 1	RNAi	37769	1	0
CG3959		pelo	pelota	RNAi	34771	0	0
CG4799		Pen	Pendulin	RNAi	34266	0	0
CG33198		pen-2	presenilin enhancer	RNAi	101752	0	0
CG6760		Pex1	Peroxin 1	RNAi	27741	0	0
CG7864		Pex10	Peroxin 10	RNAi	110405	0	0
CG3639		Pex12	Peroxin 12	RNAi	34671	0	0
CG3947		Pex16	Peroxin 16	RNAi	40886	0	0
CG3271		PGAP3	Post-GPI attachment to proteins 3 ortholog (H. sapiens)	RNAi	3985	0	0
CG8455		PGAP5	Post-GPI attachment to proteins 5 ortholog (H. sapiens)	RNAi	47953	0	0
CG8069		Phax	Phosphorylated adaptor for RNA export	RNAi	28189	0	0
CG11340		pHCl-2	pH-sensitive chloride channel 2	RNAi	22854	0	0
CG9576		Phf7	PHD finger protein 7 ortholog	RNAi	106196	0	0
CG18412		ph-p	polyhomeotic proximal	RNAi	10679	1	0
CG2699		Pi3K21B	Pi3K21B	RNAi	33556	0	0
CG5373		Pi3K59F	Phosphotidylinositol 3 kinase 59F	RNAi	100296	0	0
CG2929		Pi4KIIalpha	Pi4KIIalpha	RNAi	40995	0	0
CG10260		PI4KIIIalpha	Phosphatidylinositol 4-kinase III alpha	RNAi	15993	0	0
CG6401		PIG-A	Phosphatidylinositol glycan anchor biosynthesis class A	RNAi	39552	0	0
CG12006		PIG-B	Phosphatidylinositol glycan anchor biosynthesis class B	RNAi	39481	0	0
CG12077		PIG-C	Phosphatidylinositol glycan anchor biosynthesis, class C ortholog (H. sapiens)	RNAi	4125	0	0
CG10739		pigeon	pigeon	RNAi	31336	0	0
CG9376		PIG-F	Phosphatidylinositol glycan anchor biosynthesis class F	RNAi	9457	1	0
CG14463		PIG-H	Phosphatidylinositol glycan anchor biosynthesis class H	RNAi	44552	0	0
CG9865		PIG-M	Phosphatidylinositol glycan anchor biosynthesis class M	RNAi	101344	0	0
CG2292		PIG-N	Phosphatidylinositol glycan anchor biosynthesis class N	RNAi	51500	0	0
CG14550		PIG-P	Phosphatidylinositol glycan anchor biosynthesis class P	RNAi	4371	2	0
CG13089		PIG-U	Phosphatidylinositol glycan anchor biosynthesis, class U ortholog (H. sapiens)	RNAi	105420	0	0
CG44239		PIG-V	Phosphatidylinositol glycan anchor biosynthesis, class V ortholog (H. sapiens)	RNAi	8144	0	0
CG9870		PIG-Wa	Phosphatidylinositol glycan anchor biosynthesis class W a	RNAi	106809	0	0
CG18173		PIG-Wb	Phosphatidylinositol glycan anchor biosynthesis class W b	RNAi	4092	0	0
CG30381		PIG-X	Phosphatidylinositol glycan anchor biosynthesis class X	RNAi	49267	0	0
CG45068		PIG-Z	Phosphatidylinositol glycan anchor biosynthesis class Z	RNAi	106747	0	0
CG5052		pim	pimples	RNAi	40573	0	0
CG5692		pins	partner of inscuteable	RNAi	27486	0	0
CG13848		pinta	prolonged depolarization afterpotential (PDA) is not apparent	RNAi	28263	0	0
CG17471		PIP4K	Phosphatidylinositol 5-phosphate 4-kinase	RNAi	BL35338		0
CG3682		PIP5K59B	Phosphatidylinositol 4-phosphate 5-kinase at 59B	RNAi	47027		0
CG9245		Pis	Phosphatidylinositol synthase	RNAi	11852	0	0
CG4268		Pitslre	Pitslre	RNAi	45127		0
CG11084		pk	prickle	RNAi	11099	0	0
CG4379		Pka-C1	Protein kinase, cAMP-dependent, catalytic subunit 1	RNAi	6993	1	0
CG42341		Pka-R1	Protein kinase, cAMP-dependent, regulatory subunit type 1	RNAi	103303	0	0
CG6622		Pkc53E	Protein C kinase 53E	RNAi	27699	0	0
CG1954		Pkc98E	Protein C kinase 98E	RNAi	33434	1	0
CG42349		Pkcdelta	Protein kinase C delta	RNAi	33837		0
CG7125		PKD	Protein Kinase D	RNAi	22344	0	0
CG4574		Plc21C	Phospholipase C at 21C	RNAi	26558	0	0
CG12110		Pld	Phospholipase D	RNAi	38626	0	0
CG14133		Pldn	Pallidin	RNAi	23323	3	0
CG42612		plx	pollux	RNAi	106969	0	0
CG32250		PMP34	Peroxisomal Membrane Protein 34	RNAi	108323	0	0
CG3461		pn	prune	RNAi	6975	0	0
CG11337		PNPase	Polynucleotide phosphorylase	RNAi	16420	0	0
CG3978		pnr	pannier	RNAi	101522	0	0
CG8705		pnut	peanut	RNAi	11791		0
CG10191		Poc1	Proteome of centrioles 1	RNAi	38353	1	0
CG4532		pod1	pod1	RNAi	108886	1	0
CG3346		pon	partner of numb	RNAi	39269	1	0
CG6205		por	porcupine	RNAi	100780	0	0
CG4909		POSH	Plenty of SH3s	RNAi	26657	0	0
CG9610		Poxm	Pox meso	RNAi	106103	1	0
CG8246		Poxn	Pox neuro	RNAi	BL26238		0
CG5629		Ppcs	Phosphopantothenoylcysteine synthetase	RNAi	40601	0	0
CG3478		ppk	pickpocket	RNAi	3478R-1		0
CG8193		PPO2	Prophenoloxidase 2	RNAi	26943	1	0
CG12108		Ppt1	Palmitoyl-protein thioesterase 1	RNAi	BL55331		0
CG9296		PrBP	Prenyl-binding protein	RNAi	29096	1	0
CG7105		Proc	Proctolin	RNAi	102488	0	0
CG7740		prominin-like	prominin-like	RNAi	51957	0	0
CG17228		pros	prospero	RNAi	101477	0	0
CG30483		Prosap	Prosap	RNAi	21216	0	0
CG12405		Prx2540-1	Peroxiredoxin 2540-1	RNAi	50773	0	0
CG7217		Prx5	Peroxiredoxin 5	RNAi	12174		0
CG9187		Psf1	Psf1	RNAi	102009	0	0
CG18013		Psf2	Psf2	RNAi	33040	0	0
CG43947		PsGEF	Protostome-specific GEF	RNAi	32089	0	0
CG1817		Ptp10D	Protein tyrosine phosphatase 10D	RNAi	1101		0
CG10975		Ptp69D	Protein tyrosine phosphatase 69D	RNAi	27090		0
CG32697		Ptpmeg2	Protein tyrosine phosphatase Meg2	RNAi	21275	1	0
CG10371		PTPMT1	Protein tyrosine phosphatase, mitochondrial 1	RNAi	47623	0	0
CG7850		puc	puckered	RNAi	3018	1	0
CG34378		Pvf3	PDGF- and VEGF-related factor 3	RNAi	105008	0	0
CG8222		Pvr	PDGF- and VEGF-receptor related	RNAi	13502	0	0
CG33207		pxb	pxb	RNAi	106399	0	0
CG7660		Pxt	Peroxinectin-like	RNAi	14379	0	0
CG4816		qkr54B	quaking related 54B	RNAi	100702	0	0
CG31005		qless	qless	RNAi	106326	0	0
CG8593		qm	quemao	RNAi	47000	1	0
CG6433		qua	quail	RNAi	27623	0	0
CG33472		qvr	quiver	RNAi	104533	1	0
CG7138		r2d2	r2d2	RNAi	BL34784		0
CG17060		Rab10	Rab10	RNAi	46792	0	0
CG4212		Rab14	Rab14	RNAi	45774		0
CG3129		Rab18	Rab18	RNAi	40228	1	0
CG7062		Rab19	Rab19	RNAi	103653	0	0
CG3269		Rab2	Rab2	RNAi	34767	1	0
CG17515		Rab21	Rab21	RNAi	32940	1	0
CG2108		Rab23	Rab23	RNAi	13145	0	0
CG34410		Rab26	Rab26	RNAi	101330	0	0
CG14791		Rab27	Rab27	RNAi	BL35774		0
CG7576		Rab3	Rab3	RNAi	100787	0	0
CG9100		Rab30	Rab30	RNAi	27002	4	0
CG8024		Rab32	Rab32	RNAi	104348	2	0
CG12156		Rab39	Rab39	RNAi	31666	0	0
CG4921		Rab4	Rab4	RNAi	24672	0	0
CG1900		Rab40	Rab40	RNAi	110563	0	0
CG3664		Rab5	Rab5	RNAi	103945	1	0
CG6601		Rab6	Rab6	RNAi	100774		0
CG5915		Rab7	Rab7	RNAi	40337	0	0
CG8287		Rab8	Rab8	RNAi	28092	0	0
CG9994		Rab9	Rab9	RNAi	107192		0
CG9807		Rab9Db	Rab at 9Db	RNAi	50757	0	0
CG32671		Rab9Fa	Rab at 9Fa	RNAi	49734	0	0
CG9139		Rabex-5	Rabaptin-5-associated exchange factor for Rab5 ortholog (H. sapiens)	RNAi	46329	0	0
CG2885		RabX2	RabX2	RNAi	103311	0	0
CG31118		RabX4	RabX4	RNAi	BL28704		0
CG12015		RabX6	RabX6	RNAi	50817	0	0
CG2248		Rac1	Rac1	RNAi	49246	1	0
CG8556		Rac2	Rac2	RNAi	28926	2	0
CG2595		RacGAP84C	Rac GTPase activating protein at 84C	RNAi	43717	0	0
CG4449		Rad60	Rad60	RNAi	107905	0	0
CG9862		Rae1	Rae1	RNAi	29303	0	0
CG4877		RAF2	RING-associated factor 2	RNAi	21966	0	0
CG11968		RagA-B	Ras-related GTP binding A/B ortholog (H. sapiens)	RNAi	110629	0	0
CG42236		RanBPM	Ran-binding protein M	RNAi	BL61172		0
CG1956		Rap1	Rap1 GTPase	RNAi	20761		0
CG3204		Rap2l	Ras-associated protein 2-like	RNAi	45230	0	0
CG44086		RapGAP1	Rap GTPase activating protein 1	RNAi	26721	0	0
CG1167		Ras64B	Ras oncogene at 64B	RNAi	6225	0	0
CG1167		Ras64B	Ras oncogene at 64B	RNAi	1167R-1	x	0
CG6721		RasGAP1	Ras GTPase activating protein 1	RNAi	23016	2	0
CG8965		rau	rau	RNAi	102683	0	0
CG15889		Ravus	Ravus	RNAi	32457	0	0
CG11427		rb	ruby	RNAi	38504		0
CG5585		Rbbp5	Retinoblastoma binding protein 5	RNAi	106139	0	0
CG1987		Rbp1-like	Rbp1-like	RNAi	105883	0	0
CG8233		Rcd1	Reduction in Cnn dots 1	RNAi	24248	0	0
CG17295		Rcd4	Reduction in Cnn dots 4	RNAi	25251	0	0
CG1135		Rcd5	Reduction in Cnn dots 5	RNAi	15613	0	0
CG11175		Rcd6	Reduction in Cnn dots 6	RNAi	37201	0	0
CG14098		Rcd7	Reduction in Cnn dots 7	RNAi	20200	0	0
CG42667		rdgA	retinal degeneration A	RNAi	3024	0	0
CG11111		rdgB	retinal degeneration B	RNAi	BL28796		0
CG15151		rdo	reduced ocelli	RNAi	107213	5	0
CG5392		Reck	Reversion-inducing-cysteine-rich protein with kazal motifs	RNAi	52427	1	0
CG6192		Reps	-	RNAi	110704	0	0
CG14396		Ret	Ret oncogene	RNAi	107648	0	0
CG12189		Rev1	Rev1	RNAi	13617	0	0
CG11064		Rfabg	Retinoid- and fatty acid-binding glycoprotein	RNAi	6867		0
CG5313		RfC3	Replication factor C subunit 3	RNAi	108001	1	0
CG6312		Rfx	Rfx	RNAi	BL61847		0
CG44011		Rgk1	Rad, Gem/Kir family member 1	RNAi	25574	0	0
CG34390		Rgk2	Rad, Gem/Kir family member 2	RNAi	102599	0	0
CG34397		Rgk3	Rad, Gem/Kir family member 3	RNAi	43516	0	0
CG6831		rhea	rhea	RNAi	6831R-2		0
CG1081		Rheb	Ras homolog enriched in brain ortholog (H. sapiens)	RNAi	BL33966		0
CG8972		rho-7	rhomboid-7	RNAi	45847	0	0
CG5701		RhoBTB	Rho-related BTB domain containing	RNAi	100815	0	0
CG1976		RhoGAP100F	Rho GTPase activating protein at 100F	RNAi	106241	0	0
CG42316		RhoGAP102A	Rho GTPase activating protein at 102A	RNAi	32933	0	0
CG7122		RhoGAP16F	Rho GTPase activating protein at 16F	RNAi	102029	0	0
CG6477		RhoGAP54D	Rho GTPase activating protein at 54D	RNAi	108743	0	0
CG3208		RhoGAP5A	Rho GTPase activating protein at 5A	RNAi	41779	3	0
CG4755		RhoGAP92B	Rho GTPase activating protein at 92B	RNAi	34896	0	0
CG3421		RhoGAP93B	Rho GTPase activating protein at 93B	RNAi	100136	0	0
CG9635		RhoGEF2	Rho guanine nucleotide exchange factor 2	RNAi	BL34643		0
CG9366		RhoL	Rho-like	RNAi	102461	0	0
CG34104		RhoU	RhoU	RNAi	46957	0	0
CG8497		Rhp	Rhophilin	RNAi	24111	0	0
CG7230		rib	ribbon	RNAi	103977	0	0
CG8418		Ric	Ras-related protein interacting with calmodulin	RNAi	35930	0	0
CG15797		ric8a	ric8a	RNAi	41603	0	0
CG30149		rig	rigor mortis	RNAi	21109	0	0
CG33547		Rim	Rab3 interacting molecule	RNAi	39384	0	0
CG18145		Ripalpha	RPA-interacting protein alpha	RNAi	105563	0	0
CG8161		Rlb1	Rlb1	RNAi	106061	0	0
CG11622		Rlip	Ral interacting protein	RNAi	105976	0	0
CG7036		rno	rhinoceros	RNAi	106179	0	0
CG10751		robl	roadblock	RNAi	105760	0	0
CG10838		robl22E	robl22E	RNAi	105843	0	0
CG15171		robl37BC	robl37BC	RNAi	104083	0	0
CG5481		robo2	roundabout 2	RNAi	11823	9	0
CG9774		Rok	Rho kinase	RNAi	3793	0	0
CG32096		rols	rolling pebbles	RNAi	BL56986		0
CG6129		Root	Rootletin	RNAi	22237	0	0
CG4926		Ror	Ror	RNAi	29930	0	0
CG11556		Rph	Rabphilin	RNAi	109337	2	0
CG7726		RpL11	Ribosomal protein L11	RNAi	45428	2	0
CG3203		RpL17	Ribosomal protein L17	RNAi	BL54048		0
CG9282		RpL24	Ribosomal protein L24	RNAi	BL34569		0
CG4111		RpL35	Ribosomal protein L35	RNAi	38950	0	0
CG4319		rpr	reaper	RNAi	12045	0	0
CG8857		RpS11	Ribosomal protein S11	RNAi	23475	0	0
CG8900		RpS18	Ribosomal protein S18	RNAi	23083	0	0
CG4125		rst	roughest	RNAi	27223	1	0
CG6097		rt	rotated abdomen	RNAi	BL51805		0
CG4061		Rtca	RNA 3'-terminal phosphate cyclase	RNAi	40498	0	0
CG10233		rtp	retinophilin	RNAi	109000	0	0
CG14782		rush	rush hour	RNAi	12795	0	0
CG10052		Rx	Retinal Homeobox	RNAi	106185	0	0
CG7642		ry	rosy	RNAi	106995	0	0
CG10844		RyR	Ryanodine receptor	RNAi	10844R-2		0
CG10539		S6k	Ribosomal protein S6 kinase	RNAi	104369	2	0
CG3423		SA	Stromalin	RNAi	106046	0	0
CG12952		sage	salivary gland-expressed bHLH	RNAi	BL25980		0
CG7186		SAK	Sak kinase	RNAi	105102	0	0
CG12758		sano	serrano	RNAi	104288	3	0
CG12789		santa-maria	scavenger receptor acting in neural tissue and majority of rhodopsin is absent	RNAi	33153	0	0
CG11006		Sap130	Sin3A-associated protein 130	RNAi	31395	2	0
CG12070		Sap-r	Saposin-related	RNAi	51129	0	0
CG10061		Sas-4	Spindle assembly abnormal 4 ortholog (C. elegans)	RNAi	106051	0	0
CG15524		Sas-6	Spindle assembly abnormal 6 ortholog (C. elegans)	RNAi	25073	0	0
CG7085		sau	sauron	RNAi	46151	0	0
CG33193		sav	salvador	RNAi	101323	0	0
CG1891		sax	saxophone	RNAi	46356	0	0
CG4316		Sb	Stubble	RNAi	108455	1	0
CG8095		scb	scab	RNAi	100949	0	0
CG5595		Sce	Sex combs extra	RNAi	27465		0
CG3273		sced	scrambled	RNAi	26166	0	0
CG9148		scf	supercoiling factor	RNAi	12272	0	0
CG14808		Scgdelta	Sarcoglycan delta	RNAi	102014	0	0
CG3576		schlank	schlank	RNAi	109418	0	0
CG2092		scra	scraps	RNAi	33465	0	0
CG32056		scramb1	scramblase 1	RNAi	107024	0	0
CG1893		scramb2	scramblase 2	RNAi	104647	1	0
CG1130		scrt	scratch	RNAi	1130R-2	15	0
CG7113		scu	scully	RNAi	37083	0	0
CG31695		scw	screw	RNAi	31695R-2		0
CG10497		Sdc	Syndecan	RNAi	BL51723		0
CG5227		sdk	sidekick	RNAi	9437	0	0
CG6773		Sec13	Sec13 ortholog (S. cerevisiae)	RNAi	50367	0	0
CG7359		Sec22	Sec22 ortholog (S. cerevisiae)	RNAi	9888	0	0
CG1472		Sec24AB	Sec24AB ortholog (H. sapiens)	RNAi	107154	0	0
CG9539		Sec61alpha	Sec61 alpha subunit	RNAi	42763	0	0
CG10130		Sec61beta	Sec61 beta subunit	RNAi	8785	3	0
CG9904		Seipin	Seipin	RNAi	45478	0	0
CG6584		SelR	Selenoprotein R	RNAi	26000	0	0
CG32120		sens	senseless	RNAi	32120R-1		0
CG4173		Sep2	Septin 2	RNAi	26413	0	0
CG9699		Sep4	Septin 4	RNAi	7742	1	0
CG2916		Sep5	Septin 5	RNAi	106346	0	0
CG6127		Ser	Serrate	RNAi	27172	0	0
CG16944		sesB	stress-sensitive B	RNAi	11968	1	0
CG40351		Set1	SET domain containing 1	RNAi	40682	0	0
CG10754		Sf3a2	Splicing factor 3a subunit 2	RNAi	31346	0	0
CG13900		Sf3b3	Splicing factor 3b subunit 3	RNAi	18955	0	0
CG11985		Sf3b5	Splicing factor 3b subunit 5	RNAi	22773	0	0
CG13298		Sf3b6	Splicing factor 3b subunit 6	RNAi	31777	1	0
CG2621		sgg	shaggy	RNAi	2621R-3	0	0
CG10072		sgl	sugarless	RNAi	29434		0
CG9617		Sgt1	suppressor-of-G2-allele-of-skp1	RNAi	BL34605		0
CG6757		SH3PX1	SH3PX1 ortholog (H. sapiens)	RNAi	105886	0	0
CG43128		Shab	Shaker cognate b	RNAi	108861	0	0
CG9996		shams	shams	RNAi	110462	0	0
CG3722		shg	shotgun	RNAi	8024	0	0
CG18102		shi	shibire	RNAi	105971	1	0
CG18076		shot	short stop	RNAi	18076R-2		0
CG8055		shrb	shrub	RNAi	106823	0	0
CG34379		Shroom	Shroom	RNAi	107966	0	0
CG43720		sick	sickie	RNAi	17767	0	0
CG6623		SIDL	Shal Interactor of Di-Leucine Motif	RNAi	105134	0	0
CG34418		sif	still life	RNAi	27407	2	0
CG10624		sinu	sinuous	RNAi	44929	0	0
CG7238		sip1	septin interacting protein 1	RNAi	34382	0	0
CG6284		Sirt6	Sirtuin 6	RNAi	22483	0	0
CG5278		sit	stuck in traffic	RNAi	107919	0	0
CG32434		siz	schizo	RNAi	36625	0	0
CG1747		Sk1	Sphingosine kinase 1	RNAi	32932	0	0
CG32484		Sk2	Sphingosine kinase 2	RNAi	41905	0	0
CG11963		skap	skpA associated protein	RNAi	50300	0	0
CG13701		skl	sickle	RNAi	102512		0
CG11941		SkpC	SKP1-related C	RNAi	BL33925		0
CG4200		sl	small wing	RNAi	7173	0	0
CG9506		slam	slow as molasses	RNAi	24049	0	0
CG14549		Sld5	Sld5	RNAi	43588	0	0
CG4527		Slik	Sterile20-like kinase	RNAi	43784	0	0
CG31133		Slimp	Seryl-tRNA synthetase-like insect mitochondrial protein	RNAi	33774	0	0
CG8271		Sln	Silnoon	RNAi	4607	0	0
CG6534		slou	slouch	RNAi	BL29344		0
CG10212		SMC2	Structural maintenance of chromosomes 2	RNAi	10711	0	0
CG32438		SMC5	Structural maintenance of chromosomes 5	RNAi	38969	0	0
CG16792		SmF	Small ribonucleoprotein particle protein SmF	RNAi	BL26734		0
CG11561		smo	smoothened	RNAi	BL53348		0
CG32380		SMSr	SMSr	RNAi	39483	0	0
CG4494		smt3	smt3	RNAi	34113	1	0
CG32858		sn	singed	RNAi	32579	1	0
CG11173		Snap29	Synaptosomal-associated protein 29kDa	RNAi	107947	0	0
CG9958		Snapin	Snapin ortholog (H. sapiens)	RNAi	28145	2	0
CG11281		snky	sneaky	RNAi	5247	0	0
CG8749		snRNP-U1-70K	small ribonucleoprotein particle U1 subunit 70K	RNAi	23150	1	0
CG5454		snRNP-U1-C	small ribonucleoprotein particle U1 subunit C	RNAi	22132	0	0
CG9742		SNRPG	Small nuclear ribonucleoprotein G	RNAi	39256	0	0
CG33141		sns	sticks and stones	RNAi	109442	0	0
CG2774		Snx1	Sorting nexin 1	RNAi	BL38301		0
CG6410		Snx16	Sorting nexin 16	RNAi	45575	0	0
CG6359		Snx3	Sorting nexin 3	RNAi	104494	0	0
CG8282		Snx6	Sorting nexin 6	RNAi	110170	0	0
CG1514		snz	snazarus	RNAi	105671	1	0
CG11121		so	sine oculis	RNAi	BL35028		0
CG3242		sob	sister of odd and bowl	RNAi	3242R-2	0	0
CG8991		Sobp	Sine oculis-binding protein	RNAi	BL33397		0
CG15154		Socs36E	Suppressor of cytokine signaling at 36E	RNAi	51821	1	0
CG11153		Sox102F	Sox102F	RNAi	19022	0	0
CG32139		Sox21b	Sox21b	RNAi	BL60120		0
CG18024		SoxN	SoxNeuro	RNAi	BL25996		0
CG17673		SP	Sex Peptide	RNAi	52425	0	0
CG1343		Sp1	Sp1	RNAi	12607	0	0
CG5473		SP2637	SP2637	RNAi	21567		0
CG13570		spag	spaghetti	RNAi	23895	0	0
CG12001		spartin	spartin	RNAi	16383	0	0
CG11451		Spc105R	Spc105-related	RNAi	38511	0	0
CG7242		Spc25	Spc25	RNAi	104213	0	0
CG17286		spd-2	spindle defective 2	RNAi	101882	1	0
CG4215		spel1	spellchecker1	RNAi	10374	0	0
CG10334		spi	spitz	RNAi	3920	0	0
CG8428		spin	spinster	RNAi	46030	0	0
CG10076		spir	spire	RNAi	107335	0	0
CG11124		sPLA2	secretory Phospholipase A2	RNAi	104059	0	0
CG8946		Sply	Sphingosine-1-phosphate lyase	RNAi	103485	1	0
CG31069		spn-D	spindle D	RNAi	25026	0	0
CG12114		spn-F	spn-F	RNAi	107850	1	0
CG5669		Spps	Sp1-like factor for pairing sensitive-silencing	RNAi	30734	0	0
CG30023		sprt	sprite	RNAi	107873	1	0
CG3169		Spt3	Spt3	RNAi	10818	1	0
CG7626		Spt5	Spt5	RNAi	19793	0	0
CG6506		Spt7	Spt7	RNAi	105059	0	0
CG4016		Spt-I	Serine palmitoyltransferase subunit I	RNAi	10020		0
CG12117		Sptr	Sepiapterin reductase	RNAi	17017	0	0
CG42347		sqa	spaghetti-squash activator	RNAi	101640	0	0
CG4711		squ	squash	RNAi	101017	0	0
CG5557		sqz	squeeze	RNAi	BL51509		0
CG4931		Sra-1	specifically Rac1-associated protein 1	RNAi	Klämbt 019		0
CG44128		Src42A	Src oncogene at 42A	RNAi	26019	0	0
CG7524		Src64B	Src oncogene at 64B	RNAi	35252	1	0
CG3992		srp	serpent	RNAi	35578		0
CG4457		Srp19	Signal recognition particle protein 19	RNAi	106756	0	0
CG5434		Srp72	Signal recognition particle protein 72	RNAi	43978	1	0
CG8268		Srp9	Signal recognition particle protein 9	RNAi	105682	1	0
CG8174		SRPK	SR Protein Kinase	RNAi	103416	0	0
CG11489		Srpk79D	Serine-arginine protein kinase at 79D	RNAi	102632	1	0
CG33162		SrpRbeta	Signal recognition particle receptor beta	RNAi	5150	1	0
CG17957		Sry-alpha	Serendipity alpha	RNAi	23955	0	0
CG6993		ss	spineless	RNAi	10715	0	0
CG6238		ssh	slingshot	RNAi	107998	11	0
CG9028		ssp2	short spindle 2	RNAi	47774	0	0
CG18397		ssp3	short spindle 3	RNAi	105858	1	0
CG14735		ssp5	short spindle 5	RNAi	32317	0	0
CG6619		ssp6	short spindle 6	RNAi	107399	0	0
CG32667		ssp7	short spindle 7	RNAi	49037	0	0
CG6945		sstn	stepping stone	RNAi	106907	1	0
CG31641		stai	stathmin	RNAi	32370	0	0
CG6521		Stam	Signal transducing adaptor molecule	RNAi	22497	0	0
CG11895		stan	starry night	RNAi	11895R-3	0	0
CG3522		Start1	Start1	RNAi	4053	1	0
CG11268		ste14	isoprenylcysteine carboxylmethyltransferase	RNAi	5240	0	0
CG1395		stg	string	RNAi	1395R-2	0	0
CG10522		sti	sticky	RNAi	10522R-1	0	0
CG40293		Stlk	Ste20-like kinase	RNAi	BL34620		0
CG12500		stnA	stoned A	RNAi	105203	1	0
CG12473		stnB	stoned B	RNAi	24548	0	0
CG7787		strat	stratum	RNAi	105730	0	0
CG7863		Strica	Ser/Thr-rich caspase	RNAi	22593	1	0
CG12272		Strumpellin	Strumpellin	RNAi	18750	0	0
CG3836		stwl	stonewall	RNAi	41009	0	0
CG3497		Su(H)	Suppressor of Hairless	RNAi	103597	0	0
CG12864		Su(var)2-HP2	Su(var)2-HP2	RNAi	102651	0	0
CG17149		Su(var)3-3	Suppressor of variegation 3-3	RNAi	25218	0	0
CG12298		sub	subito	RNAi	45402	0	0
CG8714		sut1	sugar transporter 1	RNAi	104983	0	0
CG17975		sut2	sugar transporter 2	RNAi	102028	0	0
CG7869		SuUR	Suppressor of Under-Replication	RNAi	35400	1	0
CG9791		Suv3	Suv3 helicase	RNAi	106048	1	0
CG3429		swa	swallow	RNAi	21681	0	0
CG2212		sws	swiss cheese	RNAi	5469	0	0
CG10392		sxc	super sex combs	RNAi	BL50909		0
CG2097		Sym	Symplekin	RNAi	BL39041		0
CG7152		Syn1	Syntrophin-like 1	RNAi	104992	1	0
CG33094		Synd	Syndapin	RNAi	40018	0	0
CG6562		Synj	Synaptojanin	RNAi	46070	0	0
CG2381		Syt7	Synaptotagmin 7	RNAi	24988	0	0
CG5559		Sytalpha	Synaptotagmin alpha	RNAi	100957	1	0
CG42333		Sytbeta	Synaptotagmin beta	RNAi	43322	0	0
CG11278		Syx13	Syntaxin 13	RNAi	8361	0	0
CG1467		Syx16	Syntaxin 16	RNAi	8644	1	0
CG7452		Syx17	Syntaxin 17	RNAi	36596	0	0
CG13626		Syx18	Syntaxin 18	RNAi	1209	0	0
CG31136		Syx1A	Syntaxin 1A	RNAi	33112	0	0
CG7736		Syx6	Syntaxin 6	RNAi	1579	1	0
CG5081		Syx7	Syntaxin 7	RNAi	5413	0	0
CG4109		Syx8	Syntaxin 8	RNAi	42561	1	0
CG9765		tacc	transforming acidic coiled-coil protein	RNAi	101439	0	0
CG7908		Tace	Tace	RNAi	2733	0	0
CG10496		TAF1C-like	TATA box-binding protein-associated factor RNA polymerase I subunit C-like	RNAi	16061	0	0
CG14217		Tao	Tao	RNAi	17432	0	0
CG6889		tara	taranis	RNAi	34363	0	0
CG5241		Tasp1	Taspase 1	RNAi	110147	0	0
CG8766		Taz	Tafazzin	RNAi	4658	0	0
CG11490		Tbc1d15-17	TBC1 domain family, member 15/17 ortholog (H. sapiens)	RNAi	20040	0	0
CG5337		TBC1D16	TBC1 domain family member 16	RNAi	22069	0	0
CG8449		TBC1D5	TBC1 domain family member 5	RNAi	24102	0	0
CG11242		TBCB	tubulin-binding cofactor B	RNAi	38466	0	0
CG7261		TBCD	tubulin folding cofactor D	RNAi	105428	0	0
CG7861		Tbce	Tubulin-specific chaperone E	RNAi	105246	1	0
CG10327		TBPH	TAR DNA-binding protein-43 homolog	RNAi	104401	0	0
CG4767		Tektin-A	Tektin A	RNAi	101714	0	0
CG10541		Tektin-C	Tektin C	RNAi	100094	1	0
CG3073		temp	tempura	RNAi	25627	0	0
CG5723		Ten-m	Tenascin major	RNAi	BL29390		0
CG6522		Tes	Testin ortholog	RNAi	22500	1	0
CG8780		tey	teyrha-meyrha	RNAi	28948	2	0
CG5041		Tfb4	TFB4 ortholog (S. cerevisiae)	RNAi	12559	0	0
CG4947		Tgt	tRNA-guanine transglycosylase	RNAi	41644	0	0
CG4103		THG	tRNA-histidine guanylyltransferase	RNAi	26390	0	0
CG4581		Thiolase	Thiolase	RNAi	BL34546		0
CG5632		thoc6	thoc6	RNAi	44766	0	0
CG8846		Thor	Thor	RNAi	35440	0	0
CG5785		thr	three rows	RNAi	48344	0	0
CG14620		tilB	touch insensitive larva B	RNAi	24883	0	0
CG9878		Tim10	Translocase of inner membrane 10	RNAi	50446	1	0
CG4898		Tm1	Tropomyosin 1	RNAi	34119	0	0
CG7364		TM9SF4	Transmembrane 9 superfamily protein member 4	RNAi	7707	0	0
CG1539		tmod	tropomodulin	RNAi	32601	1	0
CG15105		tn	thin	RNAi	19291	1	0
CG4719		Tnks	tankyrase	RNAi	21932	0	0
CG9660		toc	toucan	RNAi	24084	1	0
CG6863		tok	tolkin	RNAi	2656	0	0
CG8595		Toll-7	Toll-7	RNAi	39176	2	0
CG17762		Tomosyn	Tomosyn ortholog	RNAi	43629	0	0
CG10223		Top2	Topoisomerase 2	RNAi	30625	0	0
CG15104		Topors	Topoisomerase I-interacting protein	RNAi	105444	0	0
CG3048		Traf4	TNF-receptor-associated factor 4	RNAi	3048R-2	0	0
CG10961		Traf6	TNF-receptor-associated factor 6	RNAi	16125	1	0
CG10686		tral	trailer hitch	RNAi	BL53961		0
CG11642		TRAM	TRAM	RNAi	39187	0	0
CG4413		trem	trade embargo	RNAi	109779	0	0
CG30035		Tret1-1	Trehalose transporter 1-1	RNAi	8126	1	0
CG8234		Tret1-2	Trehalose transporter 1-2	RNAi	40980	1	0
CG17462		Trf4-2	-	RNAi	19801	1	0
CG31721		Trim9	Tripartite motif containing 9	RNAi	21405	0	0
CG18214		trio	trio	RNAi	40138	0	0
CG11280		trn	tartan	RNAi	107883	0	0
CG4758		Trp1	Translocation protein 1	RNAi	108414	0	0
CG5751		TrpA1	Transient receptor potential cation channel A1 ortholog	RNAi	37249	0	0
CG8743		Trpml	Transient receptor potential cation channel, mucolipin ortholog	RNAi	108088	3	0
CG3848		trr	trithorax-related	RNAi	10749	0	0
CG3181		Ts	Thymidylate synthase	RNAi	29354	0	0
CG10620		Tsf2	Transferrin 2	RNAi	5236	0	0
CG9712		TSG101	Tumor susceptibility gene 101	RNAi	23944	0	0
CG1374		tsh	teashirt	RNAi	16892	1	0
CG4254		tsr	twinstar	RNAi	110599	0	0
CG10210		tst	twister	RNAi	38356	0	0
CG8781		tsu	tsunagi	RNAi	36024	0	0
CG12313		ttm2	tiny tim 2	RNAi	100361	0	0
CG6691		ttm3	tiny tim 3	RNAi	3951	0	0
CG2713		ttm50	tiny tim 50	RNAi	5586	0	0
CG1693		tty	tweety	RNAi	43841	0	0
CG13345		tum	tumbleweed	RNAi	17145	0	0
CG10619		tup	tailup	RNAi	103585	0	0
CG32364		tut	tumorous testis	RNAi	26045	0	0
CG15427		tutl	turtle	RNAi	3064	0	0
CG12311		tw	Protein O-mannosyltransferase 2	RNAi	5584	0	0
CG4965		twe	twine	RNAi	46064	0	0
CG3172		twf	twinfilin	RNAi	25817	0	0
CG6235		tws	twins	RNAi	34340		0
CG17131		tyn	trynity	RNAi	5608	0	0
[truncated: 682 more rows]
[truncated: 8 more columns]
