# Supplementary material for: The Drosophila EGF domain protein uninflatable sets the switch between wrapping glia growth and axon wrapping instructed by Notch
Source: eLife. 2026 Feb 3;14:RP105759. doi: 10.7554/eLife.105759 (PMC12867482; doi:10.7554/eLife.105759)
Supplement: Supplementary file 2. [file elife-105759-supp2.xlsx]

## Sheet: supplementary Table 2
Rescue of the Htl gain of function wrapping glial phenotype by two independent dsRNA transgenes
Gene	Wrapping glial morpholgy upon knockdown	Panglial knockdown		Classification		RNAi lines
ab	very thin	let		Transcription		104582	41005
alphaSnap	thin	n.d.		Membrane dynamics		101341	BL29587
APC4	thin	n.d.		Protein stability		38988	15610R-4
Arf79F	thin	v		Membrane dynamics		BL29538	23082	103572
bab2	very thin	v		Transcription		49042	BL57419
bgm	very thin	let		Lipid synthesis		BL55918	34853	105635
CCT2	very thin	let		Protein stability		BL34711	41190
CCT7	thin	let		Protein stability		108585	28895	BL34931
Cdk12	thin	let		Cell cycle regulator		25508	BL34838
CG11180	very thin	let		Nucleic acid binding		31438	104340	BL28629
CG11779	thin - variable	let		Protein stability		16309	BL43155
CG1703	thin	let		Translation		105998	32826	BL61862
CG17652	thin/very thin	let		Translation		BL55287	110707
CG18273	very thin	let		Translation		107818	17162	35635
CG3773	thin/very thin	let		Transcription		BL42917	26281
CG5380	very thin	let		Transcription		108839	11229
CG5589	thin/very thin	v		Translation		108642	BL32334
CG9630	very thin	let		Translation		31081	107999
Chro	thin	let		Cell cycle regulator		101663	BL57470
Dbp73D	thin - variable	let		Translation		108310	36131
deltaCOP	wild typic	let		Membrane dynamics		BL31764	109455
eIF-4E	very thin	let		Translation		BL34096	7800
eIF4G	n.d.	let		Translation		17003	BL33049
gt	very thin - punctae	let		Transcription		7952R-1	BL57559
Hel25E	thin - variable	n.d.		Splicing		22557	22556	BL33666
Hsc70-4	thin - variable	let		Protein stability		26465	BL34836
l(3)72Dn	very thin	let		Splicing		42017	105427
lola	very thin	let		Transcription		41415	BL26714
mGluR	thin	v		Receptor		BL34872	1793
msk	thin	let		Nuclear import		BL33626	38963	108415
mute	very thin	let		Transcription		15610R-3	25074
noi	thin - variable	bd		Splicing		BL34845	20943
Ns1	very thin	let		Translation		BL29622	26066
Nsf2	thin - variable	let		Membrane dynamics		BL27685	7743	BL34914
Ntf-2	very thin	let		Nuclear import		49848	110108
pnt	thin	let		Transcription		7171	BL35038	105390
Prosbeta5	thin	v		Protein stability		BL34810	38659
Prosbeta7	very thin	let		Protein stability		16382	101990	BL34812
Rab11	thin - variable	let		Membrane dynamics		BL27730	22198	108382
Ras85D	thin	let		Signaling		18129	106642	BL29319
rolled	thin	let		Signaling		43123	BL34855
RpL10	n.d.	let		Translation		19084	104504
RpL3	n.d.	let		Translation		23419	109820
RpL31	n.d.	let		Translation		104467	BL44647
RpL6	n.d.	let		Translation		BL34004	51715
Rpn12	thin/very thin	let		Protein stability		21799	BL34560
RpS13	n.d.	let		Translation		17168	BL34820
RpS6	n.d.	v		Translation		105279	BL32418
Rpt2	thin/very thin	let		Protein stability		41435	BL34795	105973
Sar1	bulges - patchy (L2)	let		Membrane dynamics		BL32364	34191	108458
Sec24CD	wild typic	let		Membrane dynamics		37543	106929
Sf3a1	thin/very thin	n.d.		Splicing		20338	BL34840
Slh	thin/very thin	let		Membrane dynamics		105669	BL50940
SmB	thin	v		Splicing		40587	BL44544
Sos	thin	let		Signaling		42848	106925	BL34833
Spx	thin - variable	let		Splicing		107304	40472
SREBP	thin - variable	v		Transcription		BL25975	37641
sta	wild typic	v		Translation		101495	38823
Syx5	bulges	let		Membrane dynamics		3857	BL29397
uif	very thin	let		Adhesion		BL38354	1047	101153
UQCR-C1	very thin	let		Protein processing		40466	101350	BL51822
Vps26	wild typic	v		Membrane dynamics		18396	BL38937
