# Supplementary material for: The Drosophila EGF domain protein uninflatable sets the switch between wrapping glia growth and axon wrapping instructed by Notch
Source: eLife. 2026 Feb 3;14:RP105759. doi: 10.7554/eLife.105759 (PMC12867482; doi:10.7554/eLife.105759)
Supplement: Supplementary file 3. [file elife-105759-supp3.xlsx]

## Sheet: supplementary Table 3
Rescue of Htl gain of function wrapping glial phenotype by two overlapping dsRNA transgenes
Gene	Wrapping glial morphology upon knockdown	Panglial knockdown		Classification		RNAi lines
5-HT1B	very thin	let		Receptor		35791	BL54006
alphaTub67C	very thin/bulges	let		Cytoskelton		108044	24783
Bet1	very thin	let		Membrane dynamics		8421	8420
c12.1	very thin	let		Splicing		103745	BL34952
CCT3	thin	let		Protein stability		106093	BL34969
CCT4	thin	let		Protein stability		106099	22155
CCT6	very thin	let		Protein stability		109734	23751
CG10226	very thin	let		Transporter		10226R-2	5055
CG12325	very thin	let		Translation		31728	109301
CG31229	very thin	v		Mitochondria		9660	106764
CG33051	very thin	let		Transcription		106026	48793
CG42613	very thin	let		Lipid binding		5449R-2	102823
CG4825	very thin	let		Lipid synthesis		105470	5391
CG5160	very thin - punctae	let		Signaling		22019	106081
CG8461	wild typic	let		Translation		24103	107284
CG8534	thin	let		Lipid synthesis		BL53299	106515
CG9300	very thin	let		Translation		102649	24139
crn	thin	v		Splicing		Klämbt 010	103393
eIF-2alpha	n.d.	let		Translation		7799	104562
EndoB	very thin	let		Membrane dynamics		104712	29291
His2A:CG31618	n.d.	let		Transcription		109087	39116
KCNQ	very thin - punctae	let		Channel		8754	BL27252
l(1)G0045	thin	v		Nucleic acid binding		110189	BL51448
Lsd-1	very thin	let		Lipid binding		30884	106891
Nnp-1	very thin	let		Nucleic acid binding		31930	106204
Non3	very thin	let		Nucleic acid binding		35314	107075	BL42935
Npc2c	thin	v		Lipid binding		31139	101583
opm	very thin	let		Transporter		10168	101312
Prm	very thin	let		Cytoskelton		BL31549	33615
Ran	very thin	let		Nuclear import		104417	24835
Rbm13	very thin	let		Nucleic acid binding		110364	51701
Rcp	very thin	let		Transcription		1830	47225	101126
RhoGAP18B	thin	let		Cytoskelton		7531R-1	42080
RpL12	n.d.	let		Translation		32450	109447
RpL14	n.d.	let		Translation		102011	44629
RpL21	n.d.	let		Translation		32016	105819
RpL22	n.d.	let		Translation		104506	BL34828
RpL28	n.d.	let		Translation		49124	104021
RpL39	n.d.	let		Translation		23578	108821
RpL9	n.d.	let		Translation		22244	109647
Rpn8	thin	let		Protein stability		26183	108573
RpS16	n.d.	let		Translation		21516	100610
RpS4	n.d.	let		Translation		35720	106654
RpS5a	n.d.	let		Translation		36061	101472
Slu7	wild typic	let		Splicing		103587	BL55366
SmD2	n.d.	let		Splicing		31947	100690
SmD3	thin	let		Splicing		BL32370	103560
Smvt	thin	let		Transporter		102662	40650
Srp14	thin	let		Translation		BL60428	101444
Srp54k	thin	sl		Translation		42852	BL62327
Srp68	very thin	let		Translation		104867	27351
stumps	thin	let		Signaling		105603	21317
sw	very thin	let		Cytoskelton		BL30505	101559
Tcs3	thin	let		Translation		BL42496	24675
Tsp39D	thin	let		Membrane dynamics		37127	107776
U3-55K	very thin	let		Nucleic acid binding		100841	49524
zetaCOP	wild typic	let		Lipid binding		34768	104405	BL28960
